# Supplementary material
Source: publisher figshare collection journal article supplement (https://rs.figshare.com/ndownloader/files/12744989)
Supplement: Supplementary file 1 [file 12744989]

## Sheet: photon catches of red and green
Quantum catch values for raptor photoreceptors with stimulus red (234) and green (178)
Calculations of cone and oil droplet parameters are based on Hart&Vorobyev 2003 paper, with peak sws1 taken as 405 nm from Ödeen&Håstad 2003
Single cone photon catches used for calculating colour distance in the RNL model
	SCREEN 1						SCREEN 2
		Green stimulus	Red stimulus	Single cone Michelson contrast between the two colours	Single cone relative excitation green stimulus	Single cone relative excitation red stimulus		Green stimulus	Red stimulus	Single cone Michelson contrast between the two colours	Single cone relative excitation green stimulus	Single cone relative excitation red stimulus
	VS	1.21155e+11	1.26134e+11	0.020132	0.0588314	0.0503319	VS	8.34469e+10	1.01181e+11	0.0960512	0.0445848	0.0435242
	SWS	3.22922e+11	6.75992e+10	0.6538	0.156806	0.0269745	SWS	2.89152e+11	5.49917e+10	0.680414	0.154491	0.0236554
	MWS	1.24868e+12	1.82486e+11	0.744982	0.606341	0.0728186	MWS	1.18005e+12	1.6913e+11	0.749286	0.630489	0.0727534
	LWS	3.66611e+11	2.12982e+12	0.706292	0.178021	0.849875	LWS	3.18995e+11	1.9994e+12	0.724813	0.170435	0.860067
Double cone (DC) photon catches were used to determine that stimuli are isolutminant to double cones
This was done for a range of assumed oil droplet transparancies.
		Green stimulus	Red stimulus	assumed DC pale oil droplet lambda cut value (lcutP), nm	resulting DC Michelson contrast			Green stimulus	Red stimulus	assumed DC pale oil droplet lambda cut value (lcutP), nm	resulting DC Michelson contrast
	DC	3.53364e+12	2.97153e+12	400	0.0864094		DC	3.28959e+12	2.78042e+12	400	0.0838822
		3.53324e+12	2.97112e+12	401	0.086421			3.2893e+12	2.7801e+12	401	0.0838963
		3.53283e+12	2.97072e+12	402	0.0864325			3.28901e+12	2.77977e+12	402	0.0839102
		3.53243e+12	2.97031e+12	403	0.0864441			3.28872e+12	2.77945e+12	403	0.0839241
		3.53202e+12	2.96989e+12	404	0.0864556			3.28842e+12	2.77912e+12	404	0.083938
		3.53161e+12	2.96948e+12	405	0.0864672			3.28813e+12	2.7788e+12	405	0.0839519
		3.5312e+12	2.96907e+12	406	0.0864787			3.28783e+12	2.77847e+12	406	0.0839657
		3.53079e+12	2.96865e+12	407	0.0864902			3.28753e+12	2.77814e+12	407	0.0839796
		3.53038e+12	2.96824e+12	408	0.0865018			3.28722e+12	2.7778e+12	408	0.0839934
		3.52996e+12	2.96782e+12	409	0.0865133			3.28692e+12	2.77747e+12	409	0.0840072
		3.52954e+12	2.9674e+12	410	0.0865249			3.28661e+12	2.77713e+12	410	0.0840211
		3.52912e+12	2.96697e+12	411	0.0865364			3.2863e+12	2.77679e+12	411	0.0840349
		3.52869e+12	2.96654e+12	412	0.0865479			3.28598e+12	2.77644e+12	412	0.0840487
		3.52826e+12	2.96611e+12	413	0.0865593			3.28566e+12	2.77609e+12	413	0.0840625
		3.52782e+12	2.96567e+12	414	0.0865707			3.28534e+12	2.77574e+12	414	0.0840763
		3.52738e+12	2.96523e+12	415	0.0865819			3.28501e+12	2.77539e+12	415	0.08409
		3.52693e+12	2.96479e+12	416	0.086593			3.28467e+12	2.77503e+12	416	0.0841037
		3.52647e+12	2.96434e+12	417	0.0866038			3.28433e+12	2.77466e+12	417	0.0841173
		3.52601e+12	2.96389e+12	418	0.0866144			3.28398e+12	2.7743e+12	418	0.0841308
		3.52554e+12	2.96344e+12	419	0.0866246			3.28363e+12	2.77392e+12	419	0.0841442
		3.52506e+12	2.96297e+12	420	0.0866344			3.28327e+12	2.77355e+12	420	0.0841574
		3.52457e+12	2.96251e+12	421	0.0866438			3.2829e+12	2.77316e+12	421	0.0841703
		3.52408e+12	2.96204e+12	422	0.0866525			3282529921892	2.77278e+12	422	0.084183
		3.52357e+12	2.96157e+12	423	0.0866606			3.28215e+12	2.77238e+12	423	0.0841953
		3.52305e+12	2.96109e+12	424	0.0866678			3.28176e+12	2.77199e+12	424	0.0842071
		3.52252e+12	2.9606e+12	425	0.0866742			3.28135e+12	2.77159e+12	425	0.0842183
		3.52198e+12	2.96011e+12	426	0.0866795			3.28094e+12	2.77118e+12	426	0.0842289
		3.52142e+12	2.95962e+12	427	0.0866837			3.28052e+12	2.77077e+12	427	0.0842385
		3.52085e+12	2.95913e+12	428	0.0866865			3.28009e+12	2.77035e+12	428	0.0842472
		3.52027e+12	2.95863e+12	429	0.0866879			3.27964e+12	2.76994e+12	429	0.0842546
		3.51967e+12	2.95812e+12	430	0.0866876			3.27918e+12	2.76952e+12	430	0.0842606
		3.51905e+12	2.95762e+12	431	0.0866854			3.27871e+12	2.76909e+12	431	0.084265
		3.51841e+12	2.95711e+12	432	0.0866813			3.27822e+12	2.76866e+12	432	0.0842675
		3.51776e+12	2.9566e+12	433	0.0866748			3.27772e+12	2.76824e+12	433	0.0842678
		3.51708e+12	2.95608e+12	434	0.0866658			3.27719e+12	2.76781e+12	434	0.0842657
		3.51639e+12	2.95557e+12	435	0.0866541			3.27665e+12	2.76738e+12	435	0.0842609
		3.51567e+12	2.95505e+12	436	0.0866393			3.27609e+12	2.76695e+12	436	0.084253
		3.51493e+12	2.95453e+12	437	0.0866212			3.27551e+12	2.76652e+12	437	0.0842418
		3.51416e+12	2.95402e+12	438	0.0865994			3.2749e+12	2.76609e+12	438	0.0842268
		3.51336e+12	2.9535e+12	439	0.0865737			3.27427e+12	2.76566e+12	439	0.0842077
		3.51254e+12	2.95299e+12	440	0.0865437			3.27361e+12	2.76523e+12	440	0.0841842
		3.51168e+12	2.95247e+12	441	0.0865089			3.27292e+12	2.76481e+12	441	0.0841558
		3.51079e+12	2.95196e+12	442	0.086469			3.2722e+12	2.76439e+12	442	0.084122
		3.50986e+12	2.95145e+12	443	0.0864236			3.27144e+12	2.76397e+12	443	0.0840825
		3.50889e+12	2.95094e+12	444	0.0863722			3.27065e+12	2.76355e+12	444	0.0840369
		3.50788e+12	2.95043e+12	445	0.0863144			3.26981e+12	2.76314e+12	445	0.0839845
		3.50682e+12	2.94993e+12	446	0.0862496			3.26893e+12	2.76273e+12	446	0.0839248
		3.50571e+12	2.94942e+12	447	0.0861774			3.26801e+12	2.76232e+12	447	0.0838575
		3.50455e+12	2.94892e+12	448	0.0860971			3.26703e+12	2.76192e+12	448	0.0837818
		3.50333e+12	2.94842e+12	449	0.0860081			3.266e+12	2.76151e+12	449	0.0836971
		3.50204e+12	2.94793e+12	450	0.0859099			3.26491e+12	2.76111e+12	450	0.0836029
		3.50069e+12	2.94743e+12	451	0.0858016			3.26375e+12	2.76072e+12	451	0.0834984
		3.49927e+12	2.94694e+12	452	0.0856826			3.26252e+12	2.76032e+12	452	0.0833828
		3.49776e+12	2.94645e+12	453	0.0855521			3.26122e+12	2.75993e+12	453	0.0832555
		3.49617e+12	2.94595e+12	454	0.0854093			3.25983e+12	2.75953e+12	454	0.0831154
		3.49449e+12	2.94546e+12	455	0.0852531			3.25836e+12	2.75914e+12	455	0.0829618
		3.4927e+12	2.94497e+12	456	0.0850827			3.25679e+12	2.75875e+12	456	0.0827936
		3.49081e+12	2.94448e+12	457	0.084897			3.25512e+12	2.75835e+12	457	0.0826098
		3.48881e+12	2.94398e+12	458	0.0846948			3.25334e+12	2.75796e+12	458	0.0824093
		3.48668e+12	2.94349e+12	459	0.084475			3.25145e+12	2.75756e+12	459	0.0821909
		3.48441e+12	2.94299e+12	460	0.0842363			3.24942e+12	2.75716e+12	460	0.0819532
		3.482e+12	2.94249e+12	461	0.0839774			3.24726e+12	2.75676e+12	461	0.0816949
		3.47944e+12	2.94199e+12	462	0.0836967			3.24495e+12	2.75636e+12	462	0.0814146
		3.47671e+12	2.94148e+12	463	0.0833926			3242488777561	2.75595e+12	463	0.0811106
		3.4738e+12	2.94097e+12	464	0.0830637			3.23986e+12	2.75554e+12	464	0.0807813
		3.47071e+12	2.94045e+12	465	0.0827081			3.23705e+12	2.75513e+12	465	0.080425
		3.46741e+12	2.93993e+12	466	0.0823239			3.23405e+12	2.75471e+12	466	0.0800398
		3.4639e+12	2.93941e+12	467	0.0819093			3.23084e+12	2.75428e+12	467	0.0796237
		3.46015e+12	2.93887e+12	468	0.081462			3.22742e+12	2.75386e+12	468	0.0791747
		3.45616e+12	2.93833e+12	469	0.0809801			3.22377e+12	2.75342e+12	469	0.0786905
		3.45191e+12	2.93779e+12	470	0.080461			3.21987e+12	2.75298e+12	470	0.0781689
		3.44738e+12	2.93723e+12	471	0.0799025			3.21571e+12	2.75253e+12	471	0.0776074
		3.44255e+12	2.93667e+12	472	0.0793019			3.21128e+12	2.75208e+12	472	0.0770035
		3.43741e+12	2.9361e+12	473	0.0786564			3.20655e+12	2.75161e+12	473	0.0763546
		3.43194e+12	2.93551e+12	474	0.0779633			3.20151e+12	2.75114e+12	474	0.0756576
		3.42612e+12	2.93492e+12	475	0.0772194			3.19614e+12	2.75066e+12	475	0.0749098
		3.41992e+12	2.93432e+12	476	0.0764216			3.19042e+12	2.75017e+12	476	0.0741079
		3.41332e+12	2.9337e+12	477	0.0755665			3.18433e+12	2.74967e+12	477	0.0732486
		3.40631e+12	2.93307e+12	478	0.0746506			3.17785e+12	2.74916e+12	478	0.0723285
		3.39885e+12	2.93243e+12	479	0.07367			3.17096e+12	2.74863e+12	479	0.0713438
		3.39093e+12	2.93177e+12	480	0.072621			3.16363e+12	2.74809e+12	480	0.0702908
		3.38252e+12	2.9311e+12	481	0.0714994			3.15585e+12	2.74754e+12	481	0.0691654
		3.37358e+12	2.93041e+12	482	0.0703009			3.14759e+12	2.74697e+12	482	0.0679633
		3.36411e+12	2.9297e+12	483	0.0690211			3.13882e+12	2.74639e+12	483	0.0666801
		3.35406e+12	2.92898e+12	484	0.0676552			3.12952e+12	2.74579e+12	484	0.0653112
		3.34341e+12	2.92824e+12	485	0.0661985			3.11966e+12	2.74518e+12	485	0.0638518
		3.33213e+12	2.92747e+12	486	0.064646			3.10922e+12	2.74455e+12	486	0.0622969
		3.3202e+12	2.92669e+12	487	0.0629924			3.09816e+12	2.74389e+12	487	0.0606414
		3.30758e+12	2.92589e+12	488	0.0612327			3.08647e+12	2.74322e+12	488	0.0588799
		3.29425e+12	2.92507e+12	489	0.0593613			3.07412e+12	2.74253e+12	489	0.057007
		3.28018e+12	2.92422e+12	490	0.0573728			3.06107e+12	2.74182e+12	490	0.0550172
		3.26535e+12	2.92335e+12	491	0.0552617			3.04731e+12	2.74108e+12	491	0.0529048
		3.24972e+12	2.92246e+12	492	0.0530224			3.03281e+12	2.74032e+12	492	0.0506641
		3.23327e+12	2.92154e+12	493	0.0506493			3.01754e+12	2.73954e+12	493	0.0482892
		3.21599e+12	2.92059e+12	494	0.0481368			3.00149e+12	2.73873e+12	494	0.0457743
		3.19784e+12	2.91962e+12	495	0.0454793			2.98462e+12	2.7379e+12	495	0.0431135
		3.17881e+12	2.91862e+12	496	0.0426713			2.96692e+12	2.73704e+12	496	0.0403011
		3.15888e+12	2.9176e+12	497	0.0397073			2.94837e+12	2.73616e+12	497	0.0373312
		3.13803e+12	2.91654e+12	498	0.036582			2.92895e+12	2.73524e+12	498	0.0341981
		3.11625e+12	2.91546e+12	499	0.03329			2.90865e+12	2.7343e+12	499	0.0308961
		3.09353e+12	2.91434e+12	500	0.0298262			2.88745e+12	2.73333e+12	500	0.0274195

## Sheet: Achromatic and chromatic cont
Achromatic and chromatic contrast values for raptor photoreceptors with stimulus red (234) and green (178)
Calculations of cone and oil droplet parameters are based on Hart&Vorobyev 2003 paper, with peak sws1 taken as 405 nm from Ödeen&Håstad 2003
Calculations of chromatic contrast is based on 1:2:2:4 VS:SWS:MWS:LWS cone ratio and noise level of 0.1 taken from Lind et al. 2013
	SCREEN 1								SCREEN 2
	Chromatic contrast for the whole visual system, JNDs	Acromatic contrast for VS, %	Acromatic contrast for SWS, %	Acromatic contrast for MWS, %	Acromatic contrast for LWS, %	Acromatic contrast for DC, %	DC pale oil droplet lambda cut value (lcutP), nm		Chromatic contrast for the whole visual system, JNDs	Acromatic contrast for VS, %	Acromatic contrast for SWS, %	Acromatic contrast for MWS, %	Acromatic contrast for LWS, %	Acromatic contrast for DC, %	DC pale oil droplet lambda cut value (lcutP), nm
	24.83	2.01	65.38	74.5	70.63	8.64094	400		25.75	9.61	68.04	74.93	72.48	8.38822	400
						8.6421	401							8.38963	401
						8.64325	402							8.39102	402
						8.64441	403							8.39241	403
						8.64556	404							8.3938	404
						8.64672	405							8.39519	405
						8.64787	406							8.39657	406
						8.64902	407							8.39796	407
						8.65018	408							8.39934	408
						8.65133	409							8.40072	409
						8.65249	410							8.40211	410
						8.65364	411							8.40349	411
						8.65479	412							8.40487	412
						8.65593	413							8.40625	413
						8.65707	414							8.40763	414
						8.65819	415							8.409	415
						8.6593	416							8.41037	416
						8.66038	417							8.41173	417
						8.66144	418							8.41308	418
						8.66246	419							8.41442	419
						8.66344	420							8.41574	420
						8.66438	421							8.41703	421
						8.66525	422							8.4183	422
						8.66606	423							8.41953	423
						8.66678	424							8.42071	424
						8.66742	425							8.42183	425
						8.66795	426							8.42289	426
						8.66837	427							8.42385	427
						8.66865	428							8.42472	428
						8.66879	429							8.42546	429
						8.66876	430							8.42606	430
						8.66854	431							8.4265	431
						8.66813	432							8.42675	432
						8.66748	433							8.42678	433
						8.66658	434							8.42657	434
						8.66541	435							8.42609	435
						8.66393	436							8.4253	436
						8.66212	437							8.42418	437
						8.65994	438							8.42268	438
						8.65737	439							8.42077	439
						8.65437	440							8.41842	440
						8.65089	441							8.41558	441
						8.6469	442							8.4122	442
						8.64236	443							8.40825	443
						8.63722	444							8.40369	444
						8.63144	445							8.39845	445
						8.62496	446							8.39248	446
						8.61774	447							8.38575	447
						8.60971	448							8.37818	448
						8.60081	449							8.36971	449
						8.59099	450							8.36029	450
						8.58016	451							8.34984	451
						8.56826	452							8.33828	452
						8.55521	453							8.32555	453
						8.54093	454							8.31154	454
						8.52531	455							8.29618	455
						8.50827	456							8.27936	456
						8.4897	457							8.26098	457
						8.46948	458							8.24093	458
						8.4475	459							8.21909	459
						8.42363	460							8.19532	460
						8.39774	461							8.16949	461
						8.36967	462							8.14146	462
						8.33926	463							8.11106	463
						8.30637	464							8.07813	464
						8.27081	465							8.0425	465
						8.23239	466							8.00398	466
						8.19093	467							7.96237	467
						8.1462	468							7.91747	468
						8.09801	469							7.86905	469
						8.0461	470							7.81689	470
						7.99025	471							7.76074	471
						7.93019	472							7.70035	472
						7.86564	473							7.63546	473
						7.79633	474							7.56576	474
						7.72194	475							7.49098	475
						7.64216	476							7.41079	476
						7.55665	477							7.32486	477
						7.46506	478							7.23285	478
						7.367	479							7.13438	479
						7.2621	480							7.02908	480
						7.14994	481							6.91654	481
						7.03009	482							6.79633	482
						6.90211	483							6.66801	483
						6.76552	484							6.53112	484
						6.61985	485							6.38518	485
						6.4646	486							6.22969	486
						6.29924	487							6.06414	487
						6.12327	488							5.88799	488
						5.93613	489							5.7007	489
						5.73728	490							5.50172	490
						5.52617	491							5.29048	491
						5.30224	492							5.06641	492
						5.06493	493							4.82892	493
						4.81368	494							4.57743	494
						4.54793	495							4.31135	495
						4.26713	496							4.03011	496
						3.97073	497							3.73312	497
						3.6582	498							3.41981	498
						3.329	499							3.08961	499
						2.98262	500							2.74195	500

## Sheet: Harris's Hawk A Experiment 1
SPATIAL FREQUENCY 1.09							SPATIAL FREQUENCY 2.93							SPATIAL FREQUENCY 5.86							SPATIAL FREQUENCY 11.72							SPATIAL FREQUENCY 21.97							SPATIAL FREQUENCY 35.16
Order	Contrast	Side	Choice	Good/wrong	Session		Order	Contrast	Side	Choice	Good/wrong	Session		Order	Contrast	Side	Choice	Good/wrong	Session		Order	Contrast	Side	Choice	Good/wrong	Session		Order	Contrast	Side	Choice	Good/wrong	Session		Order	Contrast	Side	Choice	Good/wrong	Session
3	10	left	left	G	A		6	3	left	right	W	A		9	5	Right	Left	W	A		15	3	right	Left	W	A		1	3	Right	Right	G	A		6	5	Left		G	A
8	10	right	right	G	A		14	3	right	right	G	A		13	5	Left	right	W	A		22	3	left	left	G	A		6	3	Left	Left	G	A		9	5	Right		G	A
16	10	right	right	G	A		19	3	left	left	G	A		24	5	Right	Left	W	A		35	3	left	left	G	A		27	3	Left	Left	G	A		13	5	Left		W	A
36	10	left	right	W	A		24	3	right	right	G	A		25	5	Left	right	W	A		40	3	right	Left	W	A		34	3	Right	Left	W	A		24	5	Right		W	A
1	10	left	right	W	B		3	3	left	left	G	B		28	5	Left	right	W	A		4	3	left	left	G	B		1	3	Right	Right	G	B		25	5	Left		W	A
5	10	right	right	G	B		4	3	right	Left	W	B		29	5	Right	Left	W	A		8	3	right	Left	W	B		19	3	Left	Left	G	B		28	5	Left		G	A
13	10	right	Left	W	B		5	3	left	right	W	B		4	5	Left	Left	G	B		23	3	left	right	W	B		20	3	Left	Left	G	B		29	5	Right		G	A
25	10	right	Left	W	B		16	3	right	Left	W	B		5	5	Left	right	W	B		30	3	left	left	G	B		33	3	Right	Left	W	B		34	5	Right		W	A
28	10	left	right	W	B		18	3	right	right	G	B		25	5	Right	Right	G	B		32	3	right	Left	W	B		34	3	Right	Right	G	B		4	5	Left		G	B
34	10	left	left	G	B		20	3	left	left	G	B		28	5	Right	Right	G	B		37	3	right	right	G	B		37	3	Left	right	W	B		5	5	Left		W	B
3	10	left	left	G	A		6	3	left	left	G	A		9	5	Right	Right	G	A		15	3	right	Left	W	A		1	3	Right	Left	W	A		20	5	Left		W	B
8	10	right	Left	W	A		14	3	right	right	G	A		13	5	Left	right	W	A		22	3	left	left	G	A		6	3	Left	Left	G	A		25	5	Right		W	B
16	10	right	Left	W	A		19	3	left	left	G	A		24	5	Right	Right	G	A		35	3	left	left	G	A		27	3	Left	Left	G	A		28	5	Right		W	B
36	10	left	left	G	A		24	3	right	right	G	A		25	5	Left	Left	G	A		40	3	right	Left	W	A		34	3	Right	Left	W	A		34	5	Right		G	B
1	10	left	right	W	B		3	3	left	left	G	B		28	5	Left	right	W	A		4	3	left	left	G	B		1	3	Right	Left	W	B		6	5	Left		G	A
5	10	right	right	G	B		4	3	right	right	G	B		29	5	Right	Left	W	A		8	3	right	right	G	B		19	3	Left	right	W	B		9	5	Right		W	A
13	10	right	Left	W	B		5	3	left	right	W	B		4	5	Left	right	W	B		23	3	left	left	G	B		20	3	Left	Left	G	B		13	5	Left		W	A
25	10	right	Left	W	B		16	3	right	Left	W	B		5	5	Left	Left	G	B		30	3	left	right	W	B		33	3	Right	Left	W	B		24	5	Right		W	A
28	10	left	left	G	B		18	3	right	Left	W	B		25	5	Right	Left	W	B		32	3	right	Left	W	B		34	3	Right	Right	G	B		25	5	Left		W	A
34	10	left	left	G	B		20	3	left	left	G	B		28	5	Right	Right	G	B		37	3	right	right	G	B		37	3	Left	Left	G	B		28	5	Left		W	A
3	10	left	left	G	A		6	3	left	left	G	A		9	5	Right	Right	G	A		15	3	right	right	G	A		1	3	Right	Right	G	A		29	5	Right		W	A
8	10	right	right	G	A		14	3	right	right	G	A		13	5	Left	right	W	A		22	3	left	left	G	A		6	3	Left	right	W	A		34	5	Right		G	A
16	10	right	right	G	A		19	3	left	left	G	A		24	5	Right	Right	G	A		35	3	left	left	G	A		27	3	Left	Left	G	A		4	5	Left		G	B
36	10	left	right	W	A		24	3	right	Left	W	A		25	5	Left	Left	G	A		40	3	right	right	G	A		34	3	Right	Left	W	A		5	5	Left		G	B
1	10	left	right	W	B		3	3	left	left	G	B		28	5	Left	Left	G	A		4	3	left	left	G	B		1	3	Right	Left	W	B		20	5	Left		G	B
5	10	right	right	G	B		4	3	right	Left	W	B		29	5	Right	Right	G	A		8	3	right	right	G	B		19	3	Left	Left	G	B		25	5	Right		G	B
13	10	right	right	G	B		5	3	left	left	G	B		4	5	Left	Left	G	B		23	3	left	right	W	B		20	3	Left	right	W	B		28	5	Right		W	B
25	10	right	right	G	B		16	3	right	Left	W	B		5	5	Left	Left	G	B		30	3	left	left	G	B		33	3	Right	Left	W	B		34	5	Right		W	B
28	10	left	right	W	B		18	3	right	right	G	B		25	5	Right	Left	W	B		32	3	right	Left	W	B		34	3	Right	Right	G	B		6	5	Left		G	A2
34	10	left	right	W	B		20	3	left	left	G	B		28	5	Right	Right	G	B		37	3	right	right	G	B		37	3	Left	right	W	B		9	5	Right		W	A2
3	10	left	left	G	A		6	3	left	left	G	A		9	5	Right	Right	G	A		15	3	right	Left	W	A		1	3	Right	Left	W	A		13	5	Left		W	A2
8	10	right	Left	W	A		14	3	right	right	G	A		13	5	Left	right	W	A		22	3	left	left	G	A		6	3	Left	Left	G	A		24	5	Right		W	A2
16	10	right	right	G	A		19	3	left	right	W	A		24	5	Right	Right	G	A		35	3	left	right	W	A		27	3	Left	right	W	A		25	5	Left		G	A2
36	10	left	right	W	A		24	3	right	Left	W	A		25	5	Left	Left	G	A		40	3	right	right	G	A		34	3	Right	Left	W	A		28	5	Left		W	A2
1	10	left	left	G	B		3	3	left	left	G	B		28	5	Left	right	W	A		4	3	left	left	G	B		1	3	Right	Right	G	B		29	5	Right		W	A2
5	10	right	right	G	B		4	3	right	Left	W	B		29	5	Right	Right	G	A		8	3	right	Left	W	B		19	3	Left	Left	G	B		4	5	Left		G	B2
13	10	right	Left	W	B		5	3	left	right	W	B		4	5	Left	Left	G	B		23	3	left	right	W	B		20	3	Left	right	W	B		5	5	Left		W	B2
25	10	right	right	G	B		16	3	right	Left	W	B		5	5	Left	right	W	B		30	3	left	left	G	B		33	3	Right	Right	G	B		25	5	Right		W	B2
28	10	left	left	G	B		18	3	right	right	G	B		25	5	Right	Right	G	B		32	3	right	right	G	B		34	3	Right	Right	G	B		28	5	Right		G	B2
34	10	left	right	W	B		20	3	left	left	G	B		28	5	Right	Left	W	B		37	3	right	Left	W	B		37	3	Left	right	W	B		34	5	Right		G	B2
7	15	left	right	W	A		3	5	right	Left	W	A		2	15	Left	Left	G	A		2	5	right	Left	W	A		9	5	Right	Right	G	A		2	15	Left		W	A
18	15	left	right	W	A		12	5	left	right	W	A		4	15	Left	Left	G	A		3	5	right	right	G	A		13	5	Left	right	W	A		4	15	Left		W	A
20	15	right	right	G	A		13	5	left	left	G	A		14	15	Right	Right	G	A		9	5	left	right	W	A		24	5	Right	Right	G	A		14	15	Right		W	A
22	15	left	right	W	A		17	5	right	Left	W	A		16	15	Left	Left	G	A		10	5	left	left	G	A		25	5	Left	Left	G	A		16	15	Left		W	A
23	15	right	Left	W	A		27	5	left	right	W	A		18	15	Right	Right	G	A		32	5	left	left	G	A		28	5	Left	right	W	A		18	15	Right		G	A
35	15	right	right	G	A		39	5	right	Left	W	A		38	15	Right	Left	W	A		33	5	right	right	G	A		29	5	Right	Left	W	A		31	15	Left		W	A
2	15	left	left	G	B		1	5	right	Left	W	B		3	15	Right	Right	G	B		16	5	left	left	G	B		4	5	Left	right	W	B		36	15	Right		G	A
15	15	left	left	G	B		17	5	left	right	W	B		14	15	Left	Left	G	B		19	5	right	Left	W	B		5	5	Left	Left	G	B		38	15	Right		G	A
26	15	right	right	G	B		32	5	left	right	W	B		17	15	Right	Left	W	B		22	5	right	right	G	B		25	5	Right	Right	G	B		3	15	Right		G	B
33	15	right	right	G	B		38	5	right	Left	W	B		35	15	Left	Left	G	B		25	5	left	right	W	B		28	5	Right	Left	W	B		11	15	Left		G	B
7	15	left	right	W	A		3	5	right	Left	W	A		2	15	Left	Left	G	A		2	5	right	Left	W	A		9	5	Right	Right	G	A		14	15	Left		W	B
18	15	left	right	W	A		12	5	left	right	W	A		4	15	Left	right	W	A		3	5	right	right	G	A		13	5	Left	right	W	A		17	15	Right		W	B
20	15	right	right	G	A		13	5	left	left	G	A		14	15	Right	Right	G	A		9	5	left	right	W	A		24	5	Right	Left	W	A		23	15	Right		G	B
22	15	left	left	G	A		17	5	right	Left	W	A		16	15	Left	right	W	A		10	5	left	left	G	A		25	5	Left	right	W	A		35	15	Left		G	B
23	15	right	Left	W	A		27	5	left	left	G	A		18	15	Right	Right	G	A		32	5	left	left	G	A		28	5	Left	right	W	A		2	15	Left		G	A
35	15	right	right	G	A		39	5	right	Left	W	A		38	15	Right	Right	G	A		33	5	right	right	G	A		29	5	Right	Left	W	A		4	15	Left		G	A
2	15	left	left	G	B		1	5	right	right	G	B		3	15	Right	Left	W	B		16	5	left	left	G	B		4	5	Left	Left	G	B		14	15	Right		W	A
15	15	left	left	G	B		17	5	left	left	G	B		14	15	Left	Left	G	B		19	5	right	right	G	B		5	5	Left	right	W	B		16	15	Left		W	A
26	15	right	Left	W	B		32	5	left	left	G	B		17	15	Right	Right	G	B		22	5	right	right	G	B		25	5	Right	Left	W	B		18	15	Right		W	A
33	15	right	right	G	B		38	5	right	right	G	B		35	15	Left	Left	G	B		25	5	left	left	G	B		28	5	Right	Left	W	B		31	15	Left		G	A
7	15	left	left	G	A		3	5	right	right	G	A		2	15	Left	Left	G	A		2	5	right	Left	W	A		9	5	Right	Right	G	A		36	15	Right		W	A
18	15	left	left	G	A		12	5	left	right	W	A		4	15	Left	right	W	A		3	5	right	right	G	A		13	5	Left	Left	G	A		38	15	Right		W	A
20	15	right	right	G	A		13	5	left	right	W	A		14	15	Right	Right	G	A		9	5	left	right	W	A		24	5	Right	Right	G	A		3	15	Right		G	B
22	15	left	left	G	A		17	5	right	right	G	A		16	15	Left	Left	G	A		10	5	left	left	G	A		25	5	Left	right	W	A		11	15	Left		G	B
23	15	right	Left	W	A		27	5	left	right	W	A		18	15	Right	Right	G	A		32	5	left	right	W	A		28	5	Left	right	W	A		14	15	Left		W	B
35	15	right	Left	W	A		39	5	right	right	G	A		38	15	Right	Left	W	A		33	5	right	right	G	A		29	5	Right	Right	G	A		17	15	Right		G	B
2	15	left	left	G	B		1	5	right	right	G	B		3	15	Right	Right	G	B		16	5	left	left	G	B		4	5	Left	Left	G	B		23	15	Right		W	B
15	15	left	left	G	B		17	5	left	right	W	B		14	15	Left	Left	G	B		19	5	right	Left	W	B		5	5	Left	right	W	B		35	15	Left		G	B
26	15	right	right	G	B		32	5	left	left	G	B		17	15	Right	Right	G	B		22	5	right	right	G	B		25	5	Right	Right	G	B		2	15	Left		G	A2
33	15	right	Left	W	B		38	5	right	right	G	B		35	15	Left	Left	G	B		25	5	left	right	W	B		28	5	Right	Left	W	B		4	15	Left		G	A2
7	15	left	left	G	A		3	5	right	Left	W	A		2	15	Left	Left	G	A		2	5	right	Left	W	A		9	5	Right	Right	G	A		14	15	Right		G	A2
18	15	left	right	W	A		12	5	left	right	W	A		4	15	Left	right	W	A		3	5	right	right	G	A		13	5	Left	Left	G	A		16	15	Left		W	A2
20	15	right	Left	W	A		13	5	left	left	G	A		14	15	Right	Right	G	A		9	5	left	right	W	A		24	5	Right	Left	W	A		18	15	Right		G	A2
22	15	left	left	G	A		17	5	right	Left	W	A		16	15	Left	Left	G	A		10	5	left	left	G	A		25	5	Left	right	W	A		31	15	Left		G	A2
23	15	right	right	G	A		27	5	left	right	W	A		18	15	Right	Right	G	A		32	5	left	left	G	A		28	5	Left	Left	G	A		38	15	Right		W	A2
35	15	right	Left	W	A		39	5	right	right	G	A		38	15	Right	Right	G	A		33	5	right	right	G	A		29	5	Right	Left	W	A		3	15	Right		G	B2
2	15	left	left	G	B		1	5	right	Left	W	B		3	15	Right	Right	G	B		16	5	left	right	W	B		4	5	Left	Left	G	B		14	15	Left		W	B2
15	15	left	left	G	B		17	5	left	right	W	B		14	15	Left	Left	G	B		19	5	right	right	G	B		5	5	Left	right	W	B		17	15	Right		G	B2
26	15	right	Left	W	B		32	5	left	left	G	B		17	15	Right	Right	G	B		22	5	right	right	G	B		25	5	Right	Right	G	B		23	15	Right		G	B2
33	15	right	Left	W	B		38	5	right	right	G	B		35	15	Left	Left	G	B		25	5	left	left	G	B		28	5	Right	Right	G	B		35	15	Left		W	B2
2	3	right	right	G	A		8	10	right	right	G	A		1	18	Right	Right	G	A		4	10	left	left	G	A		30	10	Left	Left	G	A		1	20	Right		W	A
6	3	left	left	G	A		11	10	left	left	G	A		6	18	Left	Left	G	A		7	10	right	right	G	A		31	10	Left	right	W	A		3	20	Left		G	A
14	3	left	right	W	A		33	10	left	left	G	A		27	18	Left	Left	G	A		21	10	right	Left	W	A		32	10	Right	Left	W	A		10	20	Right		G	A
17	3	right	Left	W	A		35	10	right	right	G	A		34	18	Right	Right	G	A		39	10	left	right	W	A		35	10	Left	right	W	A		19	20	Right		W	A
9	3	left	right	W	B		7	10	right	Left	W	B		1	18	Right	Right	G	B		1	10	right	right	G	B		36	10	Right	Left	W	A		27	20	Left		G	A
10	3	right	Left	W	B		12	10	right	Left	W	B		19	18	Left	Left	G	B		10	10	left	left	G	B		37	10	Right	Right	G	A		39	20	Left		G	A
18	3	right	right	G	B		23	10	left	left	G	B		20	18	Left	Left	G	B		12	10	right	right	G	B		11	10	Left	Left	G	B		1	20	Right		G	B
29	3	right	Left	W	B		24	10	right	right	G	B		33	18	Right	Right	G	B		18	10	left	left	G	B		15	10	Left	Left	G	B		6	20	Right		W	B
35	3	left	right	W	B		31	10	left	left	G	B		34	18	Right	Right	G	B		28	10	left	left	G	B		23	10	Right	Left	W	B		19	20	Left		G	B
38	3	left	left	G	B		39	10	left	left	G	B		37	18	Left	Left	G	B		33	10	right	Left	W	B		40	10	Right	Left	W	B		21	20	Right		W	B
2	3	right	right	G	A		8	10	right	right	G	A		1	18	Right	Left	W	A		4	10	left	right	W	A		30	10	Left	right	W	A		27	20	Left		G	B
6	3	left	left	G	A		11	10	left	left	G	A		6	18	Left	Left	G	A		7	10	right	Left	W	A		31	10	Left	Left	G	A		29	20	Left		W	B
14	3	left	left	G	A		33	10	left	left	G	A		27	18	Left	Left	G	A		21	10	right	right	G	A		32	10	Right	Right	G	A		38	20	Right		W	B
17	3	right	right	G	A		35	10	right	right	G	A		34	18	Right	Right	G	A		39	10	left	right	W	A		35	10	Left	right	W	A		39	20	Left		W	B
9	3	left	right	W	B		7	10	right	Left	W	B		1	18	Right	Right	G	B		1	10	right	Left	W	B		36	10	Right	Left	W	A		1	20	Right		G	A
10	3	right	Left	W	B		12	10	right	Left	W	B		19	18	Left	Left	G	B		10	10	left	left	G	B		37	10	Right	Right	G	A		3	20	Left		W	A
18	3	right	right	G	B		23	10	left	left	G	B		20	18	Left	Left	G	B		12	10	right	right	G	B		11	10	Left	Left	G	B		10	20	Right		G	A
29	3	right	right	G	B		24	10	right	right	G	B		33	18	Right	Right	G	B		18	10	left	right	W	B		15	10	Left	right	W	B		19	20	Right		G	A
35	3	left	right	W	B		31	10	left	left	G	B		34	18	Right	Right	G	B		28	10	left	left	G	B		23	10	Right	Left	W	B		27	20	Left		G	A
38	3	left	left	G	B		39	10	left	left	G	B		37	18	Left	Left	G	B		33	10	right	right	G	B		40	10	Right	Right	G	B		39	20	Left		G	A
2	3	right	right	G	A		8	10	right	right	G	A		1	18	Right	Right	G	A		4	10	left	left	G	A		30	10	Left	Left	G	A		1	20	Right		G	B
6	3	left	right	W	A		11	10	left	left	G	A		6	18	Left	Left	G	A		7	10	right	right	G	A		31	10	Left	right	W	A		6	20	Right		G	B
14	3	left	left	G	A		33	10	left	left	G	A		27	18	Left	Left	G	A		21	10	right	right	G	A		32	10	Right	Left	W	A		19	20	Left		G	B
17	3	right	Left	W	A		35	10	right	right	G	A		34	18	Right	Right	G	A		39	10	left	left	G	A		35	10	Left	right	W	A		21	20	Right		W	B
9	3	left	left	G	B		7	10	right	right	G	B		1	18	Right	Right	G	B		1	10	right	right	G	B		36	10	Right	Right	G	A		27	20	Left		G	B
10	3	right	Left	W	B		12	10	right	right	G	B		19	18	Left	Left	G	B		10	10	left	right	W	B		37	10	Right	Right	G	A		29	20	Left		W	B
18	3	right	right	G	B		23	10	left	left	G	B		20	18	Left	Left	G	B		12	10	right	Left	W	B		11	10	Left	Left	G	B		38	20	Right		G	B
29	3	right	Left	W	B		24	10	right	Left	W	B		33	18	Right	Right	G	B		18	10	left	left	G	B		15	10	Left	Left	G	B		39	20	Left		G	B
35	3	left	right	W	B		31	10	left	right	W	B		34	18	Right	Right	G	B		28	10	left	left	G	B		23	10	Right	Left	W	B		1	20	Right		G	A2
38	3	left	left	G	B		39	10	left	right	W	B		37	18	Left	Left	G	B		33	10	right	right	G	B		40	10	Right	Right	G	B		3	20	Left		W	A2
2	3	right	right	G	A		8	10	right	right	G	A		1	18	Right	Right	G	A		4	10	left	left	G	A		30	10	Left	Left	G	A		10	20	Right		G	A2
6	3	left	right	W	A		11	10	left	left	G	A		6	18	Left	Left	G	A		7	10	right	right	G	A		31	10	Left	right	W	A		19	20	Right		W	A2
14	3	left	left	G	A		33	10	left	left	G	A		27	18	Left	Left	G	A		21	10	right	right	G	A		32	10	Right	Right	G	A		27	20	Left		G	A2
17	3	right	Left	W	A		35	10	right	right	G	A		34	18	Right	Right	G	A		39	10	left	right	W	A		35	10	Left	right	W	A		39	20	Left		W	A2
9	3	left	left	G	B		7	10	right	Left	W	B		1	18	Right	Right	G	B		1	10	right	right	G	B		36	10	Right	Left	W	A		6	20	Right		W	B2
10	3	right	right	G	B		12	10	right	right	G	B		19	18	Left	Left	G	B		10	10	left	left	G	B		37	10	Right	Right	G	A		21	20	Right		G	B2
18	3	right	right	G	B		23	10	left	right	W	B		20	18	Left	Left	G	B		12	10	right	right	G	B		11	10	Left	Left	G	B		27	20	Left		G	B2
29	3	right	right	G	B		24	10	right	right	G	B		33	18	Right	Right	G	B		18	10	left	right	W	B		15	10	Left	Left	G	B		29	20	Left		G	B2
35	3	left	left	G	B		31	10	left	left	G	B		34	18	Right	Right	G	B		28	10	left	left	G	B		23	10	Right	Left	W	B		38	20	Right		G	B2
38	3	left	left	G	B		39	10	left	left	G	B		37	18	Left	Left	G	B		33	10	right	Left	W	B		40	10	Right	Right	G	B		39	20	Left		G	B2
9	30	right	Left	W	A		4	15	right	Left	W	A		3	20	Left	Left	G	A		11	15	right	right	G	A		2	15	Left	Left	G	A		8	30	Left		G	A
15	30	left	left	G	A		10	15	right	Left	W	A		10	20	Right	Right	G	A		12	15	right	right	G	A		4	15	Left	right	W	A		20	30	Left		G	A
21	30	right	Left	W	A		20	15	left	left	G	A		19	20	Right	Right	G	A		17	15	right	right	G	A		14	15	Right	Left	W	A		23	30	Right		G	A
40	30	left	left	G	A		21	15	left	left	G	A		39	20	Left	Left	G	A		20	15	left	left	G	A		16	15	Left	Left	G	A		30	30	Left		G	A
3	30	right	right	G	B		30	15	right	Left	W	A		6	20	Right	Left	W	B		26	15	left	left	G	A		18	15	Right	Right	G	A		32	30	Right		W	A
6	30	left	left	G	B		37	15	left	left	G	A		21	20	Right	Right	G	B		37	15	left	left	G	A		38	15	Right	Right	G	A		33	30	Right		G	A
7	30	right	right	G	B		8	15	left	left	G	B		27	20	Left	Left	G	B		7	15	right	right	G	B		3	15	Right	Left	W	B		8	30	Left		G	B
12	30	right	right	G	B		9	15	left	left	G	B		29	20	Left	Left	G	B		13	15	right	right	G	B		14	15	Left	right	W	B		9	30	Right		G	B
19	30	left	left	G	B		15	15	right	right	G	B		38	20	Right	Right	G	B		24	15	left	left	G	B		17	15	Right	Right	G	B		10	30	Left		G	B
23	30	left	left	G	B		40	15	right	right	G	B		39	20	Left	Left	G	B		39	15	left	right	W	B		35	15	Left	Left	G	B		15	30	Left		G	B
9	30	right	Left	W	A		4	15	right	right	G	A		3	20	Left	Left	G	A		11	15	right	right	G	A		2	15	Left	right	W	A		16	30	Right		G	B
15	30	left	right	W	A		10	15	right	right	G	A		10	20	Right	Right	G	A		12	15	right	right	G	A		4	15	Left	Left	G	A		22	30	Right		G	B
21	30	right	right	G	A		20	15	left	left	G	A		19	20	Right	Right	G	A		17	15	right	right	G	A		14	15	Right	Left	W	A		36	30	Left		G	B
40	30	left	left	G	A		21	15	left	right	W	A		39	20	Left	Left	G	A		20	15	left	left	G	A		16	15	Left	right	W	A		40	30	Right		G	B
3	30	right	right	G	B		30	15	right	right	G	A		6	20	Right	Right	G	B		26	15	left	left	G	A		18	15	Right	Right	G	A		8	30	Left		W	A
6	30	left	right	W	B		37	15	left	left	G	A		21	20	Right	Right	G	B		37	15	left	left	G	A		38	15	Right	Right	G	A		20	30	Left		G	A
7	30	right	Left	W	B		8	15	left	left	G	B		27	20	Left	Left	G	B		7	15	right	right	G	B		3	15	Right	Right	G	B		23	30	Right		G	A
12	30	right	right	G	B		9	15	left	left	G	B		29	20	Left	Left	G	B		13	15	right	right	G	B		14	15	Left	Left	G	B		30	30	Left		W	A
19	30	left	left	G	B		15	15	right	right	G	B		38	20	Right	Right	G	B		24	15	left	right	W	B		17	15	Right	Left	W	B		32	30	Right		W	A
23	30	left	left	G	B		40	15	right	right	G	B		39	20	Left	Left	G	B		39	15	left	right	W	B		35	15	Left	right	W	B		33	30	Right		G	A
9	30	right	Left	W	A		4	15	right	right	G	A		3	20	Left	Left	G	A		11	15	right	right	G	A		2	15	Left	Left	G	A		8	30	Left		G	B
15	30	left	right	W	A		10	15	right	Left	W	A		10	20	Right	Right	G	A		12	15	right	right	G	A		4	15	Left	Left	G	A		9	30	Right		G	B
21	30	right	right	G	A		20	15	left	left	G	A		19	20	Right	Right	G	A		17	15	right	right	G	A		14	15	Right	Right	G	A		10	30	Left		G	B
40	30	left	left	G	A		21	15	left	left	G	A		39	20	Left	Left	G	A		20	15	left	left	G	A		16	15	Left	Left	G	A		15	30	Left		G	B
3	30	right	right	G	B		30	15	right	right	G	A		6	20	Right	Right	G	B		26	15	left	left	G	A		18	15	Right	Left	W	A		16	30	Right		W	B
6	30	left	left	G	B		37	15	left	left	G	A		21	20	Right	Right	G	B		37	15	left	left	G	A		38	15	Right	Left	W	A		22	30	Right		G	B
7	30	right	right	G	B		8	15	left	left	G	B		27	20	Left	Left	G	B		7	15	right	right	G	B		3	15	Right	Right	G	B		36	30	Left		W	B
12	30	right	Left	W	B		9	15	left	left	G	B		29	20	Left	Left	G	B		13	15	right	right	G	B		14	15	Left	right	W	B		40	30	Right		G	B
19	30	left	left	G	B		15	15	right	right	G	B		38	20	Right	Right	G	B		24	15	left	left	G	B		17	15	Right	Right	G	B		8	30	Left		W	A2
23	30	left	left	G	B		40	15	right	right	G	B		39	20	Left	right	W	B		39	15	left	right	W	B		35	15	Left	Left	G	B		20	30	Left		G	A2
9	30	right	right	G	A		4	15	right	right	G	A		3	20	Left	Left	G	A		11	15	right	right	G	A		2	15	Left	Left	G	A		23	30	Right		G	A2
15	30	left	left	G	A		10	15	right	right	G	A		10	20	Right	Right	G	A		12	15	right	Left	W	A		4	15	Left	Left	G	A		30	30	Left		W	A2
21	30	right	right	G	A		20	15	left	left	G	A		19	20	Right	Right	G	A		17	15	right	right	G	A		14	15	Right	Right	G	A		33	30	Right		W	A2
40	30	left	left	G	A		21	15	left	left	G	A		39	20	Left	Left	G	A		20	15	left	left	G	A		16	15	Left	Left	G	A		8	30	Left		G	B2
3	30	right	right	G	B		30	15	right	right	G	A		6	20	Right	Right	G	B		26	15	left	left	G	A		18	15	Right	Right	G	A		9	30	Right		G	B2
6	30	left	left	G	B		37	15	left	left	G	A		21	20	Right	Right	G	B		37	15	left	left	G	A		38	15	Right	Right	G	A		10	30	Left		G	B2
7	30	right	right	G	B		8	15	left	left	G	B		27	20	Left	Left	G	B		7	15	right	right	G	B		3	15	Right	Right	G	B		16	30	Right		W	B2
12	30	right	right	G	B		9	15	left	left	G	B		29	20	Left	Left	G	B		13	15	right	right	G	B		14	15	Left	Left	G	B		22	30	Right		W	B2
19	30	left	left	G	B		15	15	right	right	G	B		38	20	Right	Right	G	B		24	15	left	left	G	B		17	15	Right	Right	G	B		36	30	Left		G	B2
23	30	left	left	G	B		40	15	right	right	G	B		39	20	Left	Left	G	B		39	15	left	right	W	B		35	15	Left	Left	G	B		40	30	Right		G	B2
1	5	right	right	G	A		7	20	left	left	G	A		30	25	Left	Left	G	A		1	20	right	right	G	A		3	20	Left	Left	G	A		7	50	Left		G	A
12	5	left	right	W	A		15	20	left	left	G	A		31	25	Left	Left	G	A		13	20	right	right	G	A		10	20	Right	Left	W	A		12	50	Left		G	A
25	5	right	right	G	A		16	20	right	right	G	A		32	25	Right	Right	G	A		16	20	left	left	G	A		19	20	Right	Right	G	A		17	50	Left		G	A
32	5	left	right	W	A		25	20	left	left	G	A		35	25	Left	Left	G	A		18	20	left	left	G	A		39	20	Left	Left	G	A		22	50	Right		G	A
33	5	right	Left	W	A		32	20	right	right	G	A		36	25	Right	Right	G	A		25	20	right	right	G	A		6	20	Right	Right	G	B		26	50	Right		G	A
38	5	left	left	G	A		34	20	right	right	G	A		37	25	Right	Right	G	A		38	20	left	left	G	A		21	20	Right	Right	G	B		40	50	Right		G	A
4	5	right	Left	W	B		6	20	left	left	G	B		11	25	Left	Left	G	B		14	20	left	left	G	B		27	20	Left	Left	G	B		12	50	Right		G	B
11	5	left	right	W	B		19	20	right	right	G	B		15	25	Left	Left	G	B		15	20	right	right	G	B		29	20	Left	Left	G	B		24	50	Left		G	B
16	5	left	right	W	B		30	20	right	right	G	B		23	25	Right	Right	G	B		17	20	left	left	G	B		38	20	Right	Right	G	B		30	50	Left		G	B
22	5	right	Left	W	B		36	20	left	left	G	B		40	25	Right	Right	G	B		26	20	right	right	G	B		39	20	Left	Left	G	B		32	50	Right		G	B
1	5	right	Left	W	A		7	20	left	left	G	A		30	25	Left	Left	G	A		1	20	right	right	G	A		3	20	Left	Left	G	A		33	50	Right		G	B
12	5	left	left	G	A		15	20	left	left	G	A		31	25	Left	Left	G	A		13	20	right	right	G	A		10	20	Right	Right	G	A		37	50	Left		G	B
25	5	right	right	G	A		16	20	right	right	G	A		32	25	Right	Right	G	A		16	20	left	left	G	A		19	20	Right	Right	G	A		7	50	Left		G	A
32	5	left	right	W	A		25	20	left	left	G	A		35	25	Left	Left	G	A		18	20	left	left	G	A		39	20	Left	Left	G	A		12	50	Left		G	A
33	5	right	Left	W	A		32	20	right	right	G	A		36	25	Right	Right	G	A		25	20	right	right	G	A		6	20	Right	Right	G	B		17	50	Left		G	A
38	5	left	right	W	A		34	20	right	right	G	A		37	25	Right	Right	G	A		38	20	left	left	G	A		21	20	Right	Right	G	B		22	50	Right		G	A
4	5	right	Left	W	B		6	20	left	left	G	B		11	25	Left	Left	G	B		14	20	left	left	G	B		27	20	Left	Left	G	B		26	50	Right		G	A
11	5	left	left	G	B		19	20	right	right	G	B		15	25	Left	Left	G	B		15	20	right	right	G	B		29	20	Left	Left	G	B		40	50	Right		G	A
16	5	left	right	W	B		30	20	right	right	G	B		23	25	Right	Right	G	B		17	20	left	right	W	B		38	20	Right	Right	G	B		12	50	Right		G	B
22	5	right	right	G	B		36	20	left	left	G	B		40	25	Right	Right	G	B		26	20	right	right	G	B		39	20	Left	Left	G	B		24	50	Left		G	B
1	5	right	Left	W	A		7	20	left	left	G	A		30	25	Left	Left	G	A		1	20	right	right	G	A		3	20	Left	Left	G	A		30	50	Left		G	B
12	5	left	left	G	A		15	20	left	left	G	A		31	25	Left	Left	G	A		13	20	right	right	G	A		10	20	Right	Left	W	A		32	50	Right		G	B
25	5	right	right	G	A		16	20	right	right	G	A		32	25	Right	Right	G	A		16	20	left	left	G	A		19	20	Right	Right	G	A		33	50	Right		G	B
32	5	left	left	G	A		25	20	left	left	G	A		35	25	Left	Left	G	A		18	20	left	left	G	A		39	20	Left	Left	G	A		37	50	Left		G	B
33	5	right	right	G	A		32	20	right	right	G	A		36	25	Right	Right	G	A		25	20	right	right	G	A		6	20	Right	Left	W	B		7	50	Left		G	A2
38	5	left	left	G	A		34	20	right	right	G	A		37	25	Right	Right	G	A		38	20	left	left	G	A		21	20	Right	Left	W	B		12	50	Left		G	A2
4	5	right	Left	W	B		6	20	left	left	G	B		11	25	Left	Left	G	B		14	20	left	left	G	B		27	20	Left	Left	G	B		17	50	Left		G	A2
11	5	left	right	W	B		19	20	right	right	G	B		15	25	Left	Left	G	B		15	20	right	right	G	B		29	20	Left	Left	G	B		22	50	Right		G	A2
16	5	left	left	G	B		30	20	right	right	G	B		23	25	Right	Right	G	B		17	20	left	left	G	B		38	20	Right	Right	G	B		26	50	Right		G	A2
22	5	right	Left	W	B		36	20	left	left	G	B		40	25	Right	Right	G	B		26	20	right	right	G	B		39	20	Left	Left	G	B		40	50	Right		G	A2
1	5	right	Left	W	A		7	20	left	left	G	A		30	25	Left	Left	G	A		1	20	right	right	G	A		3	20	Left	Left	G	A		12	50	Right		G	B2
12	5	left	right	W	A		15	20	left	left	G	A		31	25	Left	Left	G	A		13	20	right	right	G	A		10	20	Right	Right	G	A		24	50	Left		W	B2
25	5	right	Left	W	A		16	20	right	right	G	A		32	25	Right	Right	G	A		16	20	left	left	G	A		19	20	Right	Left	W	A		30	50	Left		G	B2
32	5	left	right	W	A		25	20	left	left	G	A		35	25	Left	Left	G	A		18	20	left	left	G	A		39	20	Left	Left	G	A		32	50	Right		G	B2
33	5	right	Left	W	A		32	20	right	right	G	A		36	25	Right	Right	G	A		25	20	right	right	G	A		6	20	Right	Left	W	B		33	50	Right		W	B2
38	5	left	right	W	A		34	20	right	right	G	A		37	25	Right	Right	G	A		38	20	left	right	W	A		21	20	Right	Left	W	B		37	50	Left		W	B2
4	5	right	Left	W	B		6	20	left	left	G	B		11	25	Left	Left	G	B		14	20	left	left	G	B		27	20	Left	Left	G	B		34	50	Right		G	A2
11	5	left	left	G	B		19	20	right	right	G	B		15	25	Left	Left	G	B		15	20	right	right	G	B		29	20	Left	Left	G	B		1	50	Right		G	B2
16	5	left	right	W	B		30	20	right	right	G	B		23	25	Right	Right	G	B		17	20	left	left	G	B		38	20	Right	Right	G	B		19	50	Left		G	B2
22	5	right	right	G	B		36	20	left	left	G	B		40	25	Right	Right	G	B		26	20	right	right	G	B		39	20	Left	Left	G	B		20	50	Left		G	B2
10	50	left	right	W	A		5	30	left	left	G	A		8	30	Left	Left	G	A		6	30	left	left	G	A		8	30	Left	Left	G	A		32	70	Right		G	A2
13	50	right	right	G	A		22	30	right	right	G	A		20	30	Left	Left	G	A		14	30	left	left	G	A		20	30	Left	right	W	A		36	70	Right		G	A2
24	50	left	left	G	A		23	30	left	left	G	A		23	30	Right	Right	G	A		28	30	right	right	G	A		23	30	Right	Left	W	A		11	70	Left		W	B2
28	50	right	right	G	A		28	30	right	right	G	A		33	30	Right	Right	G	A		36	30	right	right	G	A		33	30	Right	Right	G	A		15	70	Left		G	B2
30	50	right	Left	W	A		10	30	left	left	G	B		8	30	Left	Left	G	B		2	30	right	right	G	B		8	30	Left	Left	G	B		5	70	Right		G	A
31	50	left	left	G	A		11	30	right	right	G	B		9	30	Right	Right	G	B		5	30	left	left	G	B		9	30	Right	Right	G	B		11	70	Right		G	A
8	50	right	Left	W	B		13	30	left	left	G	B		10	30	Left	Left	G	B		11	30	right	right	G	B		10	30	Left	Left	G	B		15	70	Left		G	A
17	50	left	left	G	B		21	30	right	right	G	B		16	30	Right	Right	G	B		27	30	left	left	G	B		16	30	Right	Right	G	B		21	70	Left		G	A
36	50	left	left	G	B		29	30	left	left	G	B		22	30	Right	Right	G	B		34	30	left	left	G	B		22	30	Right	Right	G	B		35	70	Left		G	A
37	50	right	right	G	B		33	30	right	right	G	B		36	30	Left	Left	G	B		40	30	right	right	G	B		36	30	Left	Left	G	B		37	70	Right		W	A
10	50	left	left	G	A		5	30	left	left	G	A		8	30	Left	Left	G	A		6	30	left	left	G	A		8	30	Left	Left	G	A		2	70	Left		G	B
13	50	right	right	G	A		22	30	right	right	G	A		20	30	Left	Left	G	A		14	30	left	left	G	A		20	30	Left	Left	G	A		7	70	Right		G	B
24	50	left	left	G	A		23	30	left	left	G	A		23	30	Right	Left	W	A		28	30	right	right	G	A		23	30	Right	Left	W	A		13	70	Left		G	B
28	50	right	Left	W	A		28	30	right	right	G	A		33	30	Right	Right	G	A		36	30	right	right	G	A		33	30	Right	Right	G	A		18	70	Right		G	B
30	50	right	right	G	A		10	30	left	left	G	B		8	30	Left	Left	G	B		2	30	right	right	G	B		8	30	Left	Left	G	B		26	70	Right		G	B
31	50	left	left	G	A		11	30	right	right	G	B		9	30	Right	Right	G	B		5	30	left	left	G	B		9	30	Right	Right	G	B		31	70	Left		G	B
8	50	right	right	G	B		13	30	left	left	G	B		10	30	Left	Left	G	B		11	30	right	right	G	B		10	30	Left	Left	G	B		5	70	Right		G	A
17	50	left	left	G	B		21	30	right	right	G	B		16	30	Right	Right	G	B		27	30	left	left	G	B		16	30	Right	Right	G	B		11	70	Right		G	A
36	50	left	left	G	B		29	30	left	left	G	B		22	30	Right	Right	G	B		34	30	left	left	G	B		22	30	Right	Right	G	B		15	70	Left		W	A
37	50	right	right	G	B		33	30	right	right	G	B		36	30	Left	Left	G	B		40	30	right	right	G	B		36	30	Left	Left	G	B		21	70	Left		G	A
10	50	left	left	G	A		5	30	left	left	G	A		8	30	Left	Left	G	A		6	30	left	left	G	A		8	30	Left	Left	G	A		35	70	Left		G	A
13	50	right	right	G	A		22	30	right	right	G	A		20	30	Left	Left	G	A		14	30	left	left	G	A		20	30	Left	Left	G	A		37	70	Right		G	A
24	50	left	left	G	A		23	30	left	left	G	A		23	30	Right	Right	G	A		28	30	right	right	G	A		23	30	Right	Left	W	A		2	70	Left		G	B
28	50	right	right	G	A		28	30	right	right	G	A		33	30	Right	Right	G	A		36	30	right	right	G	A		33	30	Right	Right	G	A		7	70	Right		G	B
30	50	right	right	G	A		10	30	left	left	G	B		8	30	Left	Left	G	B		2	30	right	right	G	B		8	30	Left	Left	G	B		13	70	Left		G	B
31	50	left	left	G	A		11	30	right	right	G	B		9	30	Right	Right	G	B		5	30	left	right	W	B		9	30	Right	Right	G	B		18	70	Right		G	B
8	50	right	right	G	B		13	30	left	left	G	B		10	30	Left	Left	G	B		11	30	right	right	G	B		10	30	Left	Left	G	B		26	70	Right		G	B
17	50	left	left	G	B		21	30	right	right	G	B		16	30	Right	Right	G	B		27	30	left	left	G	B		16	30	Right	Right	G	B		31	70	Left		G	B
36	50	left	left	G	B		29	30	left	left	G	B		22	30	Right	Right	G	B		34	30	left	left	G	B		22	30	Right	Right	G	B		5	70	Right		G	A2
37	50	right	right	G	B		33	30	right	right	G	B		36	30	Left	Left	G	B		40	30	right	right	G	B		36	30	Left	Left	G	B		11	70	Right		G	A2
10	50	left	left	G	A		5	30	left	left	G	A		8	30	Left	Left	G	A		6	30	left	left	G	A		8	30	Left	Left	G	A		15	70	Left		G	A2
13	50	right	right	G	A		22	30	right	right	G	A		20	30	Left	Left	G	A		14	30	left	right	W	A		20	30	Left	Left	G	A		21	70	Left		G	A2
24	50	left	left	G	A		23	30	left	left	G	A		23	30	Right	Right	G	A		28	30	right	right	G	A		23	30	Right	Right	G	A		35	70	Left		G	A2
28	50	right	Left	W	A		28	30	right	right	G	A		33	30	Right	Right	G	A		36	30	right	right	G	A		33	30	Right	Right	G	A		37	70	Right		G	A2
30	50	right	Left	W	A		10	30	left	left	G	B		8	30	Left	Left	G	B		2	30	right	right	G	B		8	30	Left	Left	G	B		2	70	Left		G	B2
31	50	left	left	G	A		11	30	right	right	G	B		9	30	Right	Right	G	B		5	30	left	left	G	B		9	30	Right	Right	G	B		7	70	Right		W	B2
8	50	right	right	G	B		13	30	left	left	G	B		10	30	Left	Left	G	B		11	30	right	right	G	B		10	30	Left	Left	G	B		13	70	Left		G	B2
17	50	left	left	G	B		21	30	right	right	G	B		16	30	Right	Right	G	B		27	30	left	left	G	B		16	30	Right	Right	G	B		18	70	Right		G	B2
36	50	left	right	W	B		29	30	left	left	G	B		22	30	Right	Right	G	B		34	30	left	left	G	B		22	30	Right	Right	G	B		26	70	Right		G	B2
37	50	right	right	G	B		33	30	right	right	G	B		36	30	Left	Left	G	B		40	30	right	right	G	B		36	30	Left	Left	G	B		31	70	Left		G	B2
19	70	left	left	G	A		2	50	left	left	G	A		7	50	Left	Left	G	A		5	50	right	right	G	A		7	50	Left	Left	G	A
27	70	right	right	G	A		9	50	right	right	G	A		12	50	Left	Left	G	A		8	50	left	left	G	A		12	50	Left	Left	G	A
34	70	right	right	G	A		18	50	right	right	G	A		17	50	Left	Left	G	A		23	50	right	right	G	A		17	50	Left	Left	G	A
37	70	left	left	G	A		26	50	left	left	G	A		22	50	Right	Right	G	A		27	50	left	left	G	A		22	50	Right	Right	G	A
14	70	right	right	G	B		31	50	left	left	G	A		26	50	Right	Right	G	A		30	50	left	left	G	A		26	50	Right	Right	G	A
21	70	right	right	G	B		40	50	right	right	G	A		40	50	Right	Right	G	A		34	50	right	right	G	A		40	50	Right	Right	G	A
24	70	left	left	G	B		25	50	right	right	G	B		12	50	Right	Right	G	B		6	50	left	left	G	B		12	50	Right	Right	G	B
31	70	left	left	G	B		26	50	right	right	G	B		24	50	Left	Left	G	B		9	50	right	right	G	B		24	50	Left	Left	G	B
39	70	left	left	G	B		27	50	left	left	G	B		30	50	Left	Left	G	B		21	50	left	left	G	B		30	50	Left	Left	G	B
40	70	right	right	G	B		28	50	left	left	G	B		32	50	Right	Right	G	B		36	50	right	right	G	B		32	50	Right	Right	G	B
19	70	left	left	G	A		2	50	left	left	G	A		7	50	Left	Left	G	A		5	50	right	right	G	A		7	50	Left	Left	G	A
27	70	right	right	G	A		9	50	right	right	G	A		12	50	Left	Left	G	A		8	50	left	left	G	A		12	50	Left	Left	G	A
34	70	right	right	G	A		18	50	right	right	G	A		17	50	Left	Left	G	A		23	50	right	right	G	A		17	50	Left	Left	G	A
37	70	left	left	G	A		26	50	left	left	G	A		22	50	Right	Right	G	A		27	50	left	left	G	A		22	50	Right	Right	G	A
14	70	right	right	G	B		31	50	left	left	G	A		26	50	Right	Right	G	A		30	50	left	left	G	A		26	50	Right	Right	G	A
21	70	right	Left	W	B		40	50	right	right	G	A		40	50	Right	Right	G	A		34	50	right	right	G	A		40	50	Right	Right	G	A
24	70	left	left	G	B		25	50	right	right	G	B		12	50	Right	Right	G	B		6	50	left	left	G	B		12	50	Right	Right	G	B
31	70	left	left	G	B		26	50	right	right	G	B		24	50	Left	Left	G	B		9	50	right	right	G	B		24	50	Left	Left	G	B
39	70	left	left	G	B		27	50	left	left	G	B		30	50	Left	Left	G	B		21	50	left	left	G	B		30	50	Left	Left	G	B
40	70	right	right	G	B		28	50	left	left	G	B		32	50	Right	Right	G	B		36	50	right	right	G	B		32	50	Right	Right	G	B
19	70	left	left	G	A		2	50	left	left	G	A		7	50	Left	Left	G	A		5	50	right	right	G	A		7	50	Left	Left	G	A
27	70	right	right	G	A		9	50	right	right	G	A		12	50	Left	Left	G	A		8	50	left	left	G	A		12	50	Left	Left	G	A
34	70	right	right	G	A		18	50	right	right	G	A		17	50	Left	Left	G	A		23	50	right	right	G	A		17	50	Left	Left	G	A
37	70	left	left	G	A		26	50	left	left	G	A		22	50	Right	Right	G	A		27	50	left	left	G	A		22	50	Right	Right	G	A
14	70	right	right	G	B		31	50	left	left	G	A		26	50	Right	Right	G	A		30	50	left	left	G	A		26	50	Right	Right	G	A
21	70	right	right	G	B		40	50	right	right	G	A		40	50	Right	Right	G	A		34	50	right	right	G	A		40	50	Right	Right	G	A
24	70	left	left	G	B		25	50	right	right	G	B		12	50	Right	Right	G	B		6	50	left	left	G	B		12	50	Right	Right	G	B
31	70	left	left	G	B		26	50	right	right	G	B		24	50	Left	Left	G	B		9	50	right	right	G	B		24	50	Left	Left	G	B
39	70	left	left	G	B		27	50	left	left	G	B		30	50	Left	Left	G	B		21	50	left	left	G	B		30	50	Left	Left	G	B
40	70	right	right	G	B		28	50	left	left	G	B		32	50	Right	Right	G	B		36	50	right	right	G	B		32	50	Right	Right	G	B
19	70	left	left	G	A		2	50	left	left	G	A		7	50	Left	right	W	A		5	50	right	right	G	A		7	50	Left	Left	G	A
27	70	right	right	G	A		9	50	right	right	G	A		12	50	Left	Left	G	A		8	50	left	left	G	A		12	50	Left	Left	G	A
34	70	right	right	G	A		18	50	right	right	G	A		17	50	Left	Left	G	A		23	50	right	right	G	A		17	50	Left	Left	G	A
37	70	left	left	G	A		26	50	left	left	G	A		22	50	Right	Right	G	A		27	50	left	left	G	A		22	50	Right	Right	G	A
14	70	right	right	G	B		31	50	left	left	G	A		26	50	Right	Right	G	A		30	50	left	left	G	A		26	50	Right	Right	G	A
21	70	right	Left	W	B		40	50	right	right	G	A		40	50	Right	Right	G	A		34	50	right	right	G	A		40	50	Right	Right	G	A
24	70	left	left	G	B		25	50	right	right	G	B		12	50	Right	Right	G	B		6	50	left	left	G	B		12	50	Right	Right	G	B
31	70	left	left	G	B		26	50	right	right	G	B		24	50	Left	Left	G	B		9	50	right	right	G	B		24	50	Left	Left	G	B
39	70	left	left	G	B		27	50	left	left	G	B		30	50	Left	Left	G	B		21	50	left	left	G	B		30	50	Left	Left	G	B
40	70	right	right	G	B		28	50	left	left	G	B		32	50	Right	Right	G	B		36	50	right	right	G	B		32	50	Right	Right	G	B
							1	70	right	right	G	A		5	70	Right	Right	G	A		19	70	right	right	G	A		5	70	Right	Right	G	A
							29	70	left	left	G	A		11	70	Right	Right	G	A		24	70	left	left	G	A		11	70	Right	Right	G	A
							36	70	left	left	G	A		15	70	Left	Left	G	A		29	70	left	left	G	A		15	70	Left	Left	G	A
							38	70	right	right	G	A		21	70	Left	Left	G	A		31	70	right	right	G	A		21	70	Left	Left	G	A
							2	70	right	right	G	B		2	70	Left	Left	G	B		3	70	right	right	G	B		2	70	Left	Left	G	B
							14	70	right	right	G	B		7	70	Right	Right	G	B		20	70	left	left	G	B		7	70	Right	Right	G	B
							22	70	left	left	G	B		13	70	Left	Left	G	B		29	70	right	right	G	B		13	70	Left	Left	G	B
							34	70	right	right	G	B		18	70	Right	Right	G	B		31	70	right	right	G	B		18	70	Right	Right	G	B
							35	70	left	left	G	B		26	70	Right	Right	G	B		35	70	left	left	G	B		26	70	Right	Right	G	B
							37	70	left	left	G	B		31	70	Left	Left	G	B		38	70	left	left	G	B		31	70	Left	Left	G	B
							1	70	right	right	G	A		5	70	Right	Right	G	A		19	70	right	right	G	A		5	70	Right	Right	G	A
							29	70	left	left	G	A		11	70	Right	Right	G	A		24	70	left	left	G	A		11	70	Right	Left	W	A
							36	70	left	left	G	A		15	70	Left	Left	G	A		29	70	left	left	G	A		15	70	Left	Left	G	A
							38	70	right	right	G	A		21	70	Left	Left	G	A		31	70	right	right	G	A		21	70	Left	Left	G	A
							2	70	right	right	G	B		2	70	Left	Left	G	B		3	70	right	right	G	B		2	70	Left	Left	G	B
							14	70	right	right	G	B		7	70	Right	Right	G	B		20	70	left	left	G	B		7	70	Right	Left	W	B
							22	70	left	left	G	B		13	70	Left	Left	G	B		29	70	right	right	G	B		13	70	Left	Left	G	B
							34	70	right	right	G	B		18	70	Right	Right	G	B		31	70	right	right	G	B		18	70	Right	Right	G	B
							35	70	left	left	G	B		26	70	Right	Right	G	B		35	70	left	left	G	B		26	70	Right	Right	G	B
							37	70	left	left	G	B		31	70	Left	Left	G	B		38	70	left	left	G	B		31	70	Left	Left	G	B
							1	70	right	right	G	A		5	70	Right	Right	G	A		19	70	right	right	G	A		5	70	Right	Left	W	A
							29	70	left	left	G	A		11	70	Right	Right	G	A		24	70	left	left	G	A		11	70	Right	Right	G	A
							36	70	left	left	G	A		15	70	Left	Left	G	A		29	70	left	left	G	A		15	70	Left	Left	G	A
							38	70	right	right	G	A		21	70	Left	Left	G	A		31	70	right	right	G	A		21	70	Left	Left	G	A
							2	70	right	right	G	B		2	70	Left	Left	G	B		3	70	right	right	G	B		2	70	Left	Left	G	B
							14	70	right	right	G	B		7	70	Right	Right	G	B		20	70	left	left	G	B		7	70	Right	Right	G	B
							22	70	left	left	G	B		13	70	Left	Left	G	B		29	70	right	right	G	B		13	70	Left	Left	G	B
							34	70	right	right	G	B		18	70	Right	Right	G	B		31	70	right	right	G	B		18	70	Right	Right	G	B
							35	70	left	left	G	B		26	70	Right	Right	G	B		35	70	left	left	G	B		26	70	Right	Right	G	B
							37	70	left	left	G	B		31	70	Left	Left	G	B		38	70	left	left	G	B		31	70	Left	Left	G	B
							1	70	right	right	G	A		5	70	Right	Right	G	A		19	70	right	right	G	A		5	70	Right	Right	G	A
							29	70	left	left	G	A		11	70	Right	Right	G	A		24	70	left	left	G	A		11	70	Right	Right	G	A
							36	70	left	left	G	A		15	70	Left	Left	G	A		29	70	left	left	G	A		15	70	Left	Left	G	A
							38	70	right	right	G	A		21	70	Left	Left	G	A		31	70	right	right	G	A		21	70	Left	Left	G	A
							2	70	right	right	G	B		2	70	Left	Left	G	B		3	70	right	right	G	B		2	70	Left	Left	G	B
							14	70	right	right	G	B		7	70	Right	Right	G	B		20	70	left	left	G	B		7	70	Right	Right	G	B
							22	70	left	left	G	B		13	70	Left	Left	G	B		29	70	right	right	G	B		13	70	Left	Left	G	B
							34	70	right	right	G	B		18	70	Right	Right	G	B		31	70	right	right	G	B		18	70	Right	Right	G	B
							35	70	left	left	G	B		26	70	Right	Right	G	B		35	70	left	left	G	B		26	70	Right	Right	G	B
							37	70	left	left	G	B		31	70	Left	Left	G	B		38	70	left	left	G	B		31	70	Left	Left	G	B

## Sheet: Harris's Hawk B Experiment 1
SPATIAL FREQUENCY 1.09							SPATIAL FREQUENCY 2.93							SPATIAL FREQUENCY 5.86							SPATIAL FREQUENCY 11.72							SPATIAL FREQUENCY 21.97
Order	Contrast	Side	Choice	Good/wrong	Session		Order	Contrast	Side	Choice	Good/wrong	Session		Order	Contrast	Side	Choice	Good/wrong	Session		Order	Contrast	Side	Choice	Good/wrong	Session		Order	Contrast	Side	Choice	Good/wrong	Session
3	10	left	right	W	A		6	3	left	left	G	A		9	5	Right	Right	G	A		15	3	right	right	G	A		1	3	Right	Right	G	A
8	10	right	Left	W	A		14	3	right	right	G	A		13	5	Left	right	W	A		22	3	left	left	G	A		6	3	Left	Left	G	A
16	10	right	Left	W	A		19	3	left	left	G	A		24	5	Right	Right	G	A		35	3	left	right	W	A		27	3	Left	right	W	A
36	10	left	left	G	A		24	3	right	right	G	A		25	5	Left	Left	G	A		40	3	right	right	G	A		34	3	Right	Left	W	A
1	10	left	right	W	B		3	3	left	left	G	B		28	5	Left	right	W	A		4	3	left	left	G	B		1	3	Right	Right	G	B
5	10	right	right	G	B		4	3	right	Left	W	B		29	5	Right	Left	W	A		8	3	right	Left	W	B		19	3	Left	Left	G	B
13	10	right	right	G	B		5	3	left	left	G	B		4	5	Left	right	W	B		23	3	left	right	W	B		20	3	Left	right	W	B
25	10	right	right	G	B		16	3	right	right	G	B		5	5	Left	Left	G	B		30	3	left	left	G	B		33	3	Right	Right	G	B
28	10	left	left	G	B		18	3	right	right	G	B		25	5	Right	Left	W	B		32	3	right	Left	W	B		34	3	Right	Left	W	B
34	10	left	left	G	B		20	3	left	left	G	B		28	5	Right	Left	W	B		37	3	right	Left	W	B		37	3	Left	right	W	B
3	10	left	right	W	A		6	3	left	left	G	A		9	5	Right	Right	G	A		15	3	right	right	G	A		1	3	Right	Right	G	A
8	10	right	Left	W	A		14	3	right	right	G	A		13	5	Left	right	W	A		22	3	left	left	G	A		6	3	Left	Left	G	A
16	10	right	Left	W	A		19	3	left	left	G	A		24	5	Right	Left	W	A		35	3	left	left	G	A		27	3	Left	right	W	A
36	10	left	right	W	A		24	3	right	right	G	A		25	5	Left	right	W	A		40	3	right	Left	W	A		34	3	Right	Left	W	A
1	10	left	left	G	B		3	3	left	left	G	B		28	5	Left	right	W	A		4	3	left	left	G	B		1	3	Right	Right	G	B
5	10	right	Left	W	B		4	3	right	right	G	B		29	5	Right	Left	W	A		8	3	right	Left	W	B		19	3	Left	Left	G	B
13	10	right	Left	W	B		5	3	left	left	G	B		4	5	Left	Left	G	B		23	3	left	right	W	B		20	3	Left	right	W	B
25	10	right	right	G	B		16	3	right	right	G	B		5	5	Left	right	W	B		30	3	left	left	G	B		33	3	Right	Left	W	B
28	10	left	right	W	B		18	3	right	right	G	B		25	5	Right	Right	G	B		32	3	right	Left	W	B		34	3	Right	Left	W	B
34	10	left	right	W	B		20	3	left	left	G	B		28	5	Right	Right	G	B		37	3	right	Left	W	B		37	3	Left	Left	G	B
3	10	left	left	G	A		6	3	left	left	G	A		9	5	Right	Left	W	A		15	3	right	Left	W	A		1	3	Right	Left	W	A
8	10	right	Left	W	A		14	3	right	Left	W	A		13	5	Left	Left	G	A		22	3	left	right	W	A		6	3	Left	Left	G	A
16	10	right	Left	W	A		19	3	left	left	G	A		24	5	Right	Left	W	A		35	3	left	left	G	A		27	3	Left	Left	G	A
36	10	left	left	G	A		24	3	right	right	G	A		25	5	Left	right	W	A		40	3	right	Left	W	A		34	3	Right	Left	W	A
1	10	left	left	G	B		3	3	left	left	G	B		28	5	Left	Left	G	A		4	3	left	right	W	B		1	3	Right	Left	W	B
5	10	right	Left	W	B		4	3	right	Left	W	B		29	5	Right	Left	W	A		8	3	right	Left	W	B		19	3	Left	Left	G	B
13	10	right	Left	W	B		5	3	left	left	G	B		4	5	Left	right	W	B		23	3	left	right	W	B		20	3	Left	Left	G	B
25	10	right	right	G	B		16	3	right	Left	W	B		5	5	Left	Left	G	B		30	3	left	left	G	B		33	3	Right	Right	G	B
28	10	left	left	G	B		18	3	right	Left	W	B		25	5	Right	Right	G	B		32	3	right	Left	W	B		34	3	Right	Left	W	B
34	10	left	right	W	B		20	3	left	left	G	B		28	5	Right	Left	W	B		37	3	right	Left	W	B		37	3	Left	right	W	B
3	10	left	left	G	A		6	3	left	right	W	A		9	5	Right	Right	G	A		15	3	right	right	G	A		1	3	Right	Right	G	A
8	10	right	Left	W	A		14	3	right	Left	W	A		13	5	Left	Left	G	A		22	3	left	left	G	A		6	3	Left	Left	G	A
16	10	right	right	G	A		19	3	left	right	W	A		24	5	Right	Left	W	A		35	3	left	left	G	A		27	3	Left	Left	G	A
36	10	left	right	W	A		24	3	right	right	G	A		25	5	Left	right	W	A		40	3	right	right	G	A		34	3	Right	Left	W	A
1	10	left	left	G	B		3	3	left	left	G	B		28	5	Left	right	W	A		4	3	left	left	G	B		1	3	Right	Left	W	B
5	10	right	Left	W	B		4	3	right	Left	W	B		29	5	Right	Left	W	A		8	3	right	right	G	B		19	3	Left	Left	G	B
13	10	right	Left	W	B		5	3	left	left	G	B		4	5	Left	Left	G	B		23	3	left	left	G	B		20	3	Left	Left	G	B
25	10	right	right	G	B		16	3	right	Left	W	B		5	5	Left	Left	G	B		30	3	left	left	G	B		33	3	Right	Right	G	B
28	10	left	left	G	B		18	3	right	right	G	B		25	5	Right	Right	G	B		32	3	right	Left	W	B		34	3	Right	Left	W	B
34	10	left	left	G	B		20	3	left	left	G	B		28	5	Right	Left	W	B		37	3	right	right	G	B		37	3	Left	Left	G	B
7	15	left	right	W	A		3	5	right	right	G	A		2	15	Left	Left	G	A		2	5	right	right	G	A		9	5	Right	Left	W	A
18	15	left	right	W	A		12	5	left	right	W	A		4	15	Left	Left	G	A		3	5	right	right	G	A		13	5	Left	Left	G	A
20	15	right	Left	W	A		13	5	left	left	G	A		14	15	Right	Right	G	A		9	5	left	right	W	A		24	5	Right	Left	W	A
22	15	left	left	G	A		17	5	right	Left	W	A		16	15	Left	Left	G	A		10	5	left	left	G	A		25	5	Left	right	W	A
23	15	right	Left	W	A		27	5	left	right	W	A		18	15	Right	Right	G	A		32	5	left	left	G	A		28	5	Left	Left	G	A
35	15	right	Left	W	A		39	5	right	right	G	A		38	15	Right	Left	W	A		33	5	right	right	G	A		29	5	Right	Left	W	A
2	15	left	right	W	B		1	5	right	Left	W	B		3	15	Right	Right	G	B		16	5	left	left	G	B		4	5	Left	Left	G	B
15	15	left	right	W	B		17	5	left	left	G	B		14	15	Left	Left	G	B		19	5	right	Left	W	B		5	5	Left	right	W	B
26	15	right	Left	W	B		32	5	left	right	W	B		17	15	Right	Left	W	B		22	5	right	Left	W	B		25	5	Right	Left	W	B
33	15	right	right	G	B		38	5	right	right	G	B		35	15	Left	Left	G	B		25	5	left	right	W	B		28	5	Right	Left	W	B
7	15	left	right	W	A		3	5	right	Left	W	A		2	15	Left	Left	G	A		2	5	right	Left	W	A		9	5	Right	Right	G	A
18	15	left	left	G	A		12	5	left	left	G	A		4	15	Left	Left	G	A		3	5	right	right	G	A		13	5	Left	right	W	A
20	15	right	right	G	A		13	5	left	left	G	A		14	15	Right	Left	W	A		9	5	left	left	G	A		24	5	Right	Left	W	A
22	15	left	left	G	A		17	5	right	Left	W	A		16	15	Left	Left	G	A		10	5	left	right	W	A		25	5	Left	right	W	A
23	15	right	Left	W	A		27	5	left	right	W	A		18	15	Right	Right	G	A		32	5	left	left	G	A		28	5	Left	Left	G	A
35	15	right	right	G	A		39	5	right	Left	W	A		38	15	Right	Left	W	A		33	5	right	right	G	A		29	5	Right	Right	G	A
2	15	left	left	G	B		1	5	right	right	G	B		3	15	Right	Right	G	B		16	5	left	left	G	B		4	5	Left	Left	G	B
15	15	left	left	G	B		17	5	left	left	G	B		14	15	Left	Left	G	B		19	5	right	right	G	B		5	5	Left	Left	G	B
26	15	right	right	G	B		32	5	left	left	G	B		17	15	Right	Right	G	B		22	5	right	Left	W	B		25	5	Right	Right	G	B
33	15	right	Left	W	B		38	5	right	right	G	B		35	15	Left	Left	G	B		25	5	left	right	W	B		28	5	Right	Right	G	B
7	15	left	left	G	A		3	5	right	Left	W	A		2	15	Left	Left	G	A		2	5	right	Left	W	A		9	5	Right	Left	W	A
18	15	left	left	G	A		12	5	left	left	G	A		4	15	Left	Left	G	A		3	5	right	right	G	A		13	5	Left	right	W	A
20	15	right	Left	W	A		13	5	left	right	W	A		14	15	Right	Left	W	A		9	5	left	left	G	A		24	5	Right	Left	W	A
22	15	left	left	G	A		17	5	right	Left	W	A		16	15	Left	Left	G	A		10	5	left	left	G	A		25	5	Left	right	W	A
23	15	right	right	G	A		27	5	left	left	G	A		18	15	Right	Right	G	A		32	5	left	left	G	A		28	5	Left	Left	G	A
35	15	right	Left	W	A		39	5	right	right	G	A		38	15	Right	Right	G	A		33	5	right	right	G	A		29	5	Right	Right	G	A
2	15	left	left	G	B		1	5	right	right	G	B		3	15	Right	Left	W	B		16	5	left	left	G	B		4	5	Left	right	W	B
15	15	left	left	G	B		17	5	left	left	G	B		14	15	Left	Left	G	B		19	5	right	Left	W	B		5	5	Left	Left	G	B
26	15	right	Left	W	B		32	5	left	left	G	B		17	15	Right	Right	G	B		22	5	right	Left	W	B		25	5	Right	Right	G	B
33	15	right	Left	W	B		38	5	right	Left	W	B		35	15	Left	Left	G	B		25	5	left	left	G	B		28	5	Right	Left	W	B
7	15	left	left	G	A		3	5	right	Left	W	A		2	15	Left	Left	G	A		2	5	right	Left	W	A		9	5	Right	Right	G	A
18	15	left	left	G	A		12	5	left	right	W	A		4	15	Left	Left	G	A		3	5	right	right	G	A		13	5	Left	right	W	A
20	15	right	Left	W	A		13	5	left	left	G	A		14	15	Right	Right	G	A		9	5	left	left	G	A		24	5	Right	Left	W	A
22	15	left	left	G	A		17	5	right	Left	W	A		16	15	Left	Left	G	A		10	5	left	left	G	A		25	5	Left	Left	G	A
23	15	right	right	G	A		27	5	left	left	G	A		18	15	Right	Right	G	A		32	5	left	left	G	A		28	5	Left	right	W	A
35	15	right	Left	W	A		39	5	right	right	G	A		38	15	Right	Right	G	A		33	5	right	Left	W	A		29	5	Right	Left	W	A
2	15	left	left	G	B		1	5	right	right	G	B		3	15	Right	Right	G	B		16	5	left	left	G	B		4	5	Left	Left	G	B
15	15	left	left	G	B		17	5	left	left	G	B		14	15	Left	Left	G	B		19	5	right	right	G	B		5	5	Left	Left	G	B
26	15	right	Left	W	B		32	5	left	right	W	B		17	15	Right	Right	G	B		22	5	right	right	G	B		25	5	Right	Right	G	B
33	15	right	Left	W	B		38	5	right	right	G	B		35	15	Left	Left	G	B		25	5	left	left	G	B		28	5	Right	Right	G	B
2	3	right	right	G	A		8	10	right	right	G	A		1	18	Right	Right	G	A		4	10	left	left	G	A		30	10	Left	Left	G	A
6	3	left	right	W	A		11	10	left	left	G	A		6	18	Left	Left	G	A		7	10	right	right	G	A		31	10	Left	Left	G	A
14	3	left	left	G	A		33	10	left	left	G	A		27	18	Left	Left	G	A		21	10	right	right	G	A		32	10	Right	Left	W	A
17	3	right	Left	W	A		35	10	right	right	G	A		34	18	Right	Right	G	A		39	10	left	left	G	A		35	10	Left	right	W	A
9	3	left	right	W	B		7	10	right	Left	W	B		1	18	Right	Right	G	B		1	10	right	right	G	B		36	10	Right	Left	W	A
10	3	right	Left	W	B		12	10	right	Left	W	B		19	18	Left	Left	G	B		10	10	left	left	G	B		37	10	Right	Right	G	A
18	3	right	right	G	B		23	10	left	right	W	B		20	18	Left	right	W	B		12	10	right	Left	W	B		11	10	Left	right	W	B
29	3	right	Left	W	B		24	10	right	Left	W	B		33	18	Right	Right	G	B		18	10	left	left	G	B		15	10	Left	right	W	B
35	3	left	right	W	B		31	10	left	left	G	B		34	18	Right	Right	G	B		28	10	left	right	W	B		23	10	Right	Left	W	B
38	3	left	right	W	B		39	10	left	left	G	B		37	18	Left	Left	G	B		33	10	right	right	G	B		40	10	Right	Right	G	B
2	3	right	Left	W	A		8	10	right	right	G	A		1	18	Right	Right	G	A		4	10	left	left	G	A		30	10	Left	Left	G	A
6	3	left	right	W	A		11	10	left	right	W	A		6	18	Left	Left	G	A		7	10	right	Left	W	A		31	10	Left	right	W	A
14	3	left	right	W	A		33	10	left	right	W	A		27	18	Left	Left	G	A		21	10	right	Left	W	A		32	10	Right	Left	W	A
17	3	right	Left	W	A		35	10	right	Left	W	A		34	18	Right	Left	W	A		39	10	left	left	G	A		35	10	Left	Left	G	A
9	3	left	right	W	B		7	10	right	right	G	B		1	18	Right	Right	G	B		1	10	right	right	G	B		36	10	Right	Right	G	A
10	3	right	Left	W	B		12	10	right	Left	W	B		19	18	Left	Left	G	B		10	10	left	left	G	B		37	10	Right	Left	W	A
18	3	right	Left	W	B		23	10	left	left	G	B		20	18	Left	Left	G	B		12	10	right	Left	W	B		11	10	Left	right	W	B
29	3	right	Left	W	B		24	10	right	right	G	B		33	18	Right	Right	G	B		18	10	left	right	W	B		15	10	Left	Left	G	B
35	3	left	left	G	B		31	10	left	right	W	B		34	18	Right	Right	G	B		28	10	left	left	G	B		23	10	Right	Left	W	B
38	3	left	left	G	B		39	10	left	right	W	B		37	18	Left	Left	G	B		33	10	right	right	G	B		40	10	Right	Right	G	B
2	3	right	right	G	A		8	10	right	right	G	A		1	18	Right	Right	G	A		4	10	left	left	G	A		30	10	Left	Left	G	A
6	3	left	left	G	A		11	10	left	left	G	A		6	18	Left	Left	G	A		7	10	right	right	G	A		31	10	Left	right	W	A
14	3	left	right	W	A		33	10	left	left	G	A		27	18	Left	Left	G	A		21	10	right	right	G	A		32	10	Right	Left	W	A
17	3	right	Left	W	A		35	10	right	Left	W	A		34	18	Right	Right	G	A		39	10	left	right	W	A		35	10	Left	Left	G	A
9	3	left	left	G	B		7	10	right	right	G	B		1	18	Right	Right	G	B		1	10	right	right	G	B		36	10	Right	Right	G	A
10	3	right	Left	W	B		12	10	right	Left	W	B		19	18	Left	Left	G	B		10	10	left	left	G	B		37	10	Right	Left	W	A
18	3	right	Left	W	B		23	10	left	left	G	B		20	18	Left	right	W	B		12	10	right	Left	W	B		11	10	Left	Left	G	B
29	3	right	Left	W	B		24	10	right	right	G	B		33	18	Right	Right	G	B		18	10	left	right	W	B		15	10	Left	Left	G	B
35	3	left	left	G	B		31	10	left	left	G	B		34	18	Right	Right	G	B		28	10	left	right	W	B		23	10	Right	Right	G	B
38	3	left	left	G	B		39	10	left	right	W	B		37	18	Left	Left	G	B		33	10	right	Left	W	B		40	10	Right	Left	W	B
2	3	right	Left	W	A		8	10	right	right	G	A		1	18	Right	Right	G	A		4	10	left	left	G	A		30	10	Left	right	W	A
6	3	left	right	W	A		11	10	left	left	G	A		6	18	Left	Left	G	A		7	10	right	right	G	A		31	10	Left	Left	G	A
14	3	left	right	W	A		33	10	left	right	W	A		27	18	Left	Left	G	A		21	10	right	right	G	A		32	10	Right	Right	G	A
17	3	right	Left	W	A		35	10	right	right	G	A		34	18	Right	Right	G	A		39	10	left	right	W	A		35	10	Left	right	W	A
9	3	left	left	G	B		7	10	right	right	G	B		1	18	Right	Right	G	B		1	10	right	right	G	B		36	10	Right	Left	W	A
10	3	right	right	G	B		12	10	right	right	G	B		19	18	Left	Left	G	B		10	10	left	left	G	B		37	10	Right	Left	W	A
18	3	right	right	G	B		23	10	left	right	W	B		20	18	Left	Left	G	B		12	10	right	Left	W	B		11	10	Left	right	W	B
29	3	right	Left	W	B		24	10	right	Left	W	B		33	18	Right	Right	G	B		18	10	left	left	G	B		15	10	Left	Left	G	B
35	3	left	left	G	B		31	10	left	left	G	B		34	18	Right	Right	G	B		28	10	left	left	G	B		23	10	Right	Left	W	B
38	3	left	right	W	B		39	10	left	left	G	B		37	18	Left	Left	G	B		33	10	right	right	G	B		40	10	Right	Left	W	B
9	30	right	Left	W	A		4	15	right	Left	W	A		3	20	Left	Left	G	A		11	15	right	right	G	A		2	15	Left	Left	G	A
15	30	left	right	W	A		10	15	right	Left	W	A		10	20	Right	Right	G	A		12	15	right	right	G	A		4	15	Left	right	W	A
21	30	right	Left	W	A		20	15	left	left	G	A		19	20	Right	Right	G	A		17	15	right	Left	W	A		14	15	Right	Right	G	A
40	30	left	left	G	A		21	15	left	left	G	A		39	20	Left	Left	G	A		20	15	left	left	G	A		16	15	Left	Left	G	A
3	30	right	right	G	B		30	15	right	right	G	A		6	20	Right	Right	G	B		26	15	left	left	G	A		18	15	Right	Right	G	A
6	30	left	left	G	B		37	15	left	left	G	A		21	20	Right	Right	G	B		37	15	left	left	G	A		38	15	Right	Left	W	A
7	30	right	right	G	B		8	15	left	right	W	B		27	20	Left	Left	G	B		7	15	right	right	G	B		3	15	Right	Right	G	B
12	30	right	right	G	B		9	15	left	left	G	B		29	20	Left	Left	G	B		13	15	right	right	G	B		14	15	Left	Left	G	B
19	30	left	left	G	B		15	15	right	Left	W	B		38	20	Right	Right	G	B		24	15	left	left	G	B		17	15	Right	Left	W	B
23	30	left	right	W	B		40	15	right	right	G	B		39	20	Left	Left	G	B		39	15	left	left	G	B		35	15	Left	right	W	B
9	30	right	right	G	A		4	15	right	right	G	A		3	20	Left	Left	G	A		11	15	right	right	G	A		2	15	Left	Left	G	A
15	30	left	left	G	A		10	15	right	Left	W	A		10	20	Right	Right	G	A		12	15	right	Left	W	A		4	15	Left	Left	G	A
21	30	right	Left	W	A		20	15	left	left	G	A		19	20	Right	Right	G	A		17	15	right	Left	W	A		14	15	Right	Left	W	A
40	30	left	left	G	A		21	15	left	left	G	A		39	20	Left	Left	G	A		20	15	left	right	W	A		16	15	Left	right	W	A
3	30	right	right	G	B		30	15	right	right	G	A		6	20	Right	Right	G	B		26	15	left	right	W	A		18	15	Right	Right	G	A
6	30	left	left	G	B		37	15	left	left	G	A		21	20	Right	Right	G	B		37	15	left	left	G	A		38	15	Right	Right	G	A
7	30	right	right	G	B		8	15	left	left	G	B		27	20	Left	Left	G	B		7	15	right	Left	W	B		3	15	Right	Right	G	B
12	30	right	Left	W	B		9	15	left	left	G	B		29	20	Left	Left	G	B		13	15	right	Left	W	B		14	15	Left	Left	G	B
19	30	left	left	G	B		15	15	right	Left	W	B		38	20	Right	Right	G	B		24	15	left	left	G	B		17	15	Right	Left	W	B
23	30	left	left	G	B		40	15	right	Left	W	B		39	20	Left	right	W	B		39	15	left	left	G	B		35	15	Left	right	W	B
9	30	right	right	G	A		4	15	right	right	G	A		3	20	Left	Left	G	A		11	15	right	right	G	A		2	15	Left	right	W	A
15	30	left	left	G	A		10	15	right	right	G	A		10	20	Right	Right	G	A		12	15	right	Left	W	A		4	15	Left	Left	G	A
21	30	right	Left	W	A		20	15	left	right	W	A		19	20	Right	Right	G	A		17	15	right	right	G	A		14	15	Right	Left	W	A
40	30	left	left	G	A		21	15	left	right	W	A		39	20	Left	Left	G	A		20	15	left	left	G	A		16	15	Left	Left	G	A
3	30	right	Left	W	B		30	15	right	right	G	A		6	20	Right	Right	G	B		26	15	left	left	G	A		18	15	Right	Right	G	A
6	30	left	left	G	B		37	15	left	left	G	A		21	20	Right	Right	G	B		37	15	left	left	G	A		38	15	Right	Right	G	A
7	30	right	right	G	B		8	15	left	left	G	B		27	20	Left	Left	G	B		7	15	right	right	G	B		3	15	Right	Right	G	B
12	30	right	Left	W	B		9	15	left	right	W	B		29	20	Left	Left	G	B		13	15	right	right	G	B		14	15	Left	Left	G	B
19	30	left	left	G	B		15	15	right	right	G	B		38	20	Right	Right	G	B		24	15	left	left	G	B		17	15	Right	Left	W	B
23	30	left	left	G	B		40	15	right	right	G	B		39	20	Left	Left	G	B		39	15	left	left	G	B		35	15	Left	Left	G	B
9	30	right	Left	W	A		4	15	right	right	G	A		3	20	Left	right	W	A		11	15	right	right	G	A		2	15	Left	Left	G	A
15	30	left	left	G	A		10	15	right	right	G	A		10	20	Right	Right	G	A		12	15	right	right	G	A		4	15	Left	Left	G	A
21	30	right	right	G	A		20	15	left	left	G	A		19	20	Right	Right	G	A		17	15	right	right	G	A		14	15	Right	Left	W	A
40	30	left	left	G	A		21	15	left	left	G	A		39	20	Left	Left	G	A		20	15	left	left	G	A		16	15	Left	right	W	A
3	30	right	right	G	B		30	15	right	right	G	A		6	20	Right	Right	G	B		26	15	left	left	G	A		18	15	Right	Right	G	A
6	30	left	left	G	B		37	15	left	left	G	A		21	20	Right	Right	G	B		37	15	left	left	G	A		38	15	Right	Right	G	A
7	30	right	right	G	B		8	15	left	left	G	B		27	20	Left	Left	G	B		7	15	right	right	G	B		3	15	Right	Left	W	B
12	30	right	Left	W	B		9	15	left	left	G	B		29	20	Left	Left	G	B		13	15	right	right	G	B		14	15	Left	Left	G	B
19	30	left	left	G	B		15	15	right	right	G	B		38	20	Right	Left	W	B		24	15	left	left	G	B		17	15	Right	Right	G	B
23	30	left	left	G	B		40	15	right	right	G	B		39	20	Left	Left	G	B		39	15	left	left	G	B		35	15	Left	Left	G	B
1	5	right	right	G	A		7	20	left	left	G	A		30	25	Left	Left	G	A		1	20	right	right	G	A		3	20	Left	Left	G	A
12	5	left	right	W	A		15	20	left	left	G	A		31	25	Left	Left	G	A		13	20	right	right	G	A		10	20	Right	Left	W	A
25	5	right	Left	W	A		16	20	right	right	G	A		32	25	Right	Right	G	A		16	20	left	left	G	A		19	20	Right	Left	W	A
32	5	left	right	W	A		25	20	left	left	G	A		35	25	Left	Left	G	A		18	20	left	left	G	A		39	20	Left	right	W	A
33	5	right	right	G	A		32	20	right	right	G	A		36	25	Right	Right	G	A		25	20	right	right	G	A		6	20	Right	Right	G	B
38	5	left	left	G	A		34	20	right	Left	W	A		37	25	Right	Right	G	A		38	20	left	left	G	A		21	20	Right	Right	G	B
4	5	right	Left	W	B		6	20	left	right	W	B		11	25	Left	Left	G	B		14	20	left	left	G	B		27	20	Left	right	W	B
11	5	left	right	W	B		19	20	right	right	G	B		15	25	Left	right	W	B		15	20	right	right	G	B		29	20	Left	Left	G	B
16	5	left	right	W	B		30	20	right	right	G	B		23	25	Right	Left	W	B		17	20	left	left	G	B		38	20	Right	Right	G	B
22	5	right	right	G	B		36	20	left	left	G	B		40	25	Right	Right	G	B		26	20	right	Left	W	B		39	20	Left	Left	G	B
1	5	right	Left	W	A		7	20	left	left	G	A		30	25	Left	right	W	A		1	20	right	right	G	A		3	20	Left	Left	G	A
12	5	left	left	G	A		15	20	left	left	G	A		31	25	Left	Left	G	A		13	20	right	right	G	A		10	20	Right	Right	G	A
25	5	right	right	G	A		16	20	right	right	G	A		32	25	Right	Right	G	A		16	20	left	left	G	A		19	20	Right	Left	W	A
32	5	left	left	G	A		25	20	left	left	G	A		35	25	Left	Left	G	A		18	20	left	left	G	A		39	20	Left	Left	G	A
33	5	right	Left	W	A		32	20	right	right	G	A		36	25	Right	Right	G	A		25	20	right	right	G	A		6	20	Right	Right	G	B
38	5	left	left	G	A		34	20	right	right	G	A		37	25	Right	Right	G	A		38	20	left	left	G	A		21	20	Right	Right	G	B
4	5	right	right	G	B		6	20	left	left	G	B		11	25	Left	Left	G	B		14	20	left	left	G	B		27	20	Left	Left	G	B
11	5	left	right	W	B		19	20	right	right	G	B		15	25	Left	Left	G	B		15	20	right	right	G	B		29	20	Left	Left	G	B
16	5	left	right	W	B		30	20	right	Left	W	B		23	25	Right	Right	G	B		17	20	left	left	G	B		38	20	Right	Right	G	B
22	5	right	right	G	B		36	20	left	right	W	B		40	25	Right	Right	G	B		26	20	right	right	G	B		39	20	Left	Left	G	B
1	5	right	Left	W	A		7	20	left	left	G	A		30	25	Left	Left	G	A		1	20	right	right	G	A		3	20	Left	Left	G	A
12	5	left	left	G	A		15	20	left	left	G	A		31	25	Left	Left	G	A		13	20	right	right	G	A		10	20	Right	Right	G	A
25	5	right	Left	W	A		16	20	right	right	G	A		32	25	Right	Right	G	A		16	20	left	left	G	A		19	20	Right	Right	G	A
32	5	left	left	G	A		25	20	left	right	W	A		35	25	Left	Left	G	A		18	20	left	left	G	A		39	20	Left	Left	G	A
33	5	right	Left	W	A		32	20	right	right	G	A		36	25	Right	Right	G	A		25	20	right	right	G	A		6	20	Right	Left	W	B
38	5	left	right	W	A		34	20	right	right	G	A		37	25	Right	Right	G	A		38	20	left	left	G	A		21	20	Right	Right	G	B
4	5	right	Left	W	B		6	20	left	left	G	B		11	25	Left	Left	G	B		14	20	left	left	G	B		27	20	Left	Left	G	B
11	5	left	right	W	B		19	20	right	right	G	B		15	25	Left	Left	G	B		15	20	right	Left	W	B		29	20	Left	Left	G	B
16	5	left	left	G	B		30	20	right	right	G	B		23	25	Right	Right	G	B		17	20	left	left	G	B		38	20	Right	Right	G	B
22	5	right	Left	W	B		36	20	left	left	G	B		40	25	Right	Right	G	B		26	20	right	right	G	B		39	20	Left	Left	G	B
1	5	right	Left	W	A		7	20	left	left	G	A		30	25	Left	Left	G	A		1	20	right	right	G	A		3	20	Left	Left	G	A
12	5	left	right	W	A		15	20	left	left	G	A		31	25	Left	Left	G	A		13	20	right	right	G	A		10	20	Right	Left	W	A
25	5	right	right	G	A		16	20	right	right	G	A		32	25	Right	Right	G	A		16	20	left	left	G	A		19	20	Right	Right	G	A
32	5	left	right	W	A		25	20	left	left	G	A		35	25	Left	Left	G	A		18	20	left	left	G	A		39	20	Left	Left	G	A
33	5	right	Left	W	A		32	20	right	right	G	A		36	25	Right	Right	G	A		25	20	right	right	G	A		6	20	Right	Right	G	B
38	5	left	left	G	A		34	20	right	Left	W	A		37	25	Right	Right	G	A		38	20	left	left	G	A		21	20	Right	Left	W	B
4	5	right	Left	W	B		6	20	left	left	G	B		11	25	Left	Left	G	B		14	20	left	left	G	B		27	20	Left	Left	G	B
11	5	left	left	G	B		19	20	right	right	G	B		15	25	Left	Left	G	B		15	20	right	right	G	B		29	20	Left	Left	G	B
16	5	left	right	W	B		30	20	right	right	G	B		23	25	Right	Right	G	B		17	20	left	left	G	B		38	20	Right	Right	G	B
22	5	right	right	G	B		36	20	left	left	G	B		40	25	Right	Right	G	B		26	20	right	right	G	B		39	20	Left	Left	G	B
10	50	left	left	G	A		5	30	left	left	G	A		8	30	Left	Left	G	A		6	30	left	left	G	A		8	30	Left	right	W	A
13	50	right	right	G	A		22	30	right	right	G	A		20	30	Left	Left	G	A		14	30	left	left	G	A		20	30	Left	Left	G	A
24	50	left	left	G	A		23	30	left	left	G	A		23	30	Right	Right	G	A		28	30	right	right	G	A		23	30	Right	Right	G	A
28	50	right	right	G	A		28	30	right	right	G	A		33	30	Right	Right	G	A		36	30	right	right	G	A		33	30	Right	Right	G	A
30	50	right	right	G	A		10	30	left	left	G	B		8	30	Left	Left	G	B		2	30	right	right	G	B		8	30	Left	Left	G	B
31	50	left	left	G	A		11	30	right	right	G	B		9	30	Right	Left	W	B		5	30	left	left	G	B		9	30	Right	Right	G	B
8	50	right	right	G	B		13	30	left	left	G	B		10	30	Left	Left	G	B		11	30	right	right	G	B		10	30	Left	Left	G	B
17	50	left	left	G	B		21	30	right	right	G	B		16	30	Right	Right	G	B		27	30	left	left	G	B		16	30	Right	Right	G	B
36	50	left	right	W	B		29	30	left	left	G	B		22	30	Right	Right	G	B		34	30	left	left	G	B		22	30	Right	Right	G	B
37	50	right	right	G	B		33	30	right	right	G	B		36	30	Left	Left	G	B		40	30	right	right	G	B		36	30	Left	Left	G	B
10	50	left	left	G	A		5	30	left	left	G	A		8	30	Left	Left	G	A		6	30	left	left	G	A		8	30	Left	Left	G	A
13	50	right	right	G	A		22	30	right	right	G	A		20	30	Left	Left	G	A		14	30	left	left	G	A		20	30	Left	right	W	A
24	50	left	left	G	A		23	30	left	left	G	A		23	30	Right	Right	G	A		28	30	right	right	G	A		23	30	Right	Left	W	A
28	50	right	Left	W	A		28	30	right	right	G	A		33	30	Right	Right	G	A		36	30	right	right	G	A		33	30	Right	Right	G	A
30	50	right	right	G	A		10	30	left	left	G	B		8	30	Left	Left	G	B		2	30	right	Left	W	B		8	30	Left	Left	G	B
31	50	left	left	G	A		11	30	right	right	G	B		9	30	Right	Right	G	B		5	30	left	left	G	B		9	30	Right	Right	G	B
8	50	right	right	G	B		13	30	left	left	G	B		10	30	Left	Left	G	B		11	30	right	right	G	B		10	30	Left	Left	G	B
17	50	left	left	G	B		21	30	right	right	G	B		16	30	Right	Right	G	B		27	30	left	left	G	B		16	30	Right	Right	G	B
36	50	left	left	G	B		29	30	left	right	W	B		22	30	Right	Right	G	B		34	30	left	left	G	B		22	30	Right	Right	G	B
37	50	right	right	G	B		33	30	right	right	G	B		36	30	Left	Left	G	B		40	30	right	right	G	B		36	30	Left	Left	G	B
10	50	left	left	G	A		5	30	left	left	G	A		8	30	Left	Left	G	A		6	30	left	left	G	A		8	30	Left	right	W	A
13	50	right	Left	W	A		22	30	right	right	G	A		20	30	Left	Left	G	A		14	30	left	left	G	A		20	30	Left	Left	G	A
24	50	left	left	G	A		23	30	left	left	G	A		23	30	Right	Right	G	A		28	30	right	right	G	A		23	30	Right	Right	G	A
28	50	right	Left	W	A		28	30	right	right	G	A		33	30	Right	Right	G	A		36	30	right	right	G	A		33	30	Right	Right	G	A
30	50	right	right	G	A		10	30	left	left	G	B		8	30	Left	Left	G	B		2	30	right	Left	W	B		8	30	Left	Left	G	B
31	50	left	left	G	A		11	30	right	right	G	B		9	30	Right	Right	G	B		5	30	left	left	G	B		9	30	Right	Right	G	B
8	50	right	Left	W	B		13	30	left	left	G	B		10	30	Left	Left	G	B		11	30	right	right	G	B		10	30	Left	Left	G	B
17	50	left	left	G	B		21	30	right	right	G	B		16	30	Right	Right	G	B		27	30	left	left	G	B		16	30	Right	Right	G	B
36	50	left	left	G	B		29	30	left	left	G	B		22	30	Right	Left	W	B		34	30	left	right	W	B		22	30	Right	Right	G	B
37	50	right	right	G	B		33	30	right	right	G	B		36	30	Left	Left	G	B		40	30	right	right	G	B		36	30	Left	Left	G	B
10	50	left	left	G	A		5	30	left	left	G	A		8	30	Left	Left	G	A		6	30	left	left	G	A		8	30	Left	right	W	A
13	50	right	Left	W	A		22	30	right	right	G	A		20	30	Left	Left	G	A		14	30	left	left	G	A		20	30	Left	Left	G	A
24	50	left	left	G	A		23	30	left	left	G	A		23	30	Right	Right	G	A		28	30	right	right	G	A		23	30	Right	Right	G	A
28	50	right	Left	W	A		28	30	right	right	G	A		33	30	Right	Right	G	A		36	30	right	right	G	A		33	30	Right	Right	G	A
30	50	right	right	G	A		10	30	left	left	G	B		8	30	Left	Left	G	B		2	30	right	right	G	B		8	30	Left	Left	G	B
31	50	left	left	G	A		11	30	right	right	G	B		9	30	Right	Right	G	B		5	30	left	left	G	B		9	30	Right	Left	W	B
8	50	right	right	G	B		13	30	left	left	G	B		10	30	Left	Left	G	B		11	30	right	right	G	B		10	30	Left	Left	G	B
17	50	left	left	G	B		21	30	right	right	G	B		16	30	Right	Right	G	B		27	30	left	left	G	B		16	30	Right	Right	G	B
36	50	left	left	G	B		29	30	left	left	G	B		22	30	Right	Right	G	B		34	30	left	left	G	B		22	30	Right	Right	G	B
37	50	right	Left	W	B		33	30	right	right	G	B		36	30	Left	Left	G	B		40	30	right	right	G	B		36	30	Left	Left	G	B
19	70	left	left	G	A		2	50	left	left	G	A		7	50	Left	Left	G	A		5	50	right	right	G	A		7	50	Left	Left	G	A
27	70	right	Left	W	A		9	50	right	right	G	A		12	50	Left	Left	G	A		8	50	left	left	G	A		12	50	Left	Left	G	A
34	70	right	right	G	A		18	50	right	right	G	A		17	50	Left	Left	G	A		23	50	right	right	G	A		17	50	Left	Left	G	A
37	70	left	left	G	A		26	50	left	left	G	A		22	50	Right	Right	G	A		27	50	left	left	G	A		22	50	Right	Left	W	A
14	70	right	right	G	B		31	50	left	left	G	A		26	50	Right	Right	G	A		30	50	left	left	G	A		26	50	Right	Left	W	A
21	70	right	Left	W	B		40	50	right	right	G	A		40	50	Right	Right	G	A		34	50	right	right	G	A		40	50	Right	Left	W	A
24	70	left	left	G	B		25	50	right	right	G	B		12	50	Right	Right	G	B		6	50	left	left	G	B		12	50	Right	Right	G	B
31	70	left	left	G	B		26	50	right	right	G	B		24	50	Left	Left	G	B		9	50	right	right	G	B		24	50	Left	right	W	B
39	70	left	left	G	B		27	50	left	left	G	B		30	50	Left	Left	G	B		21	50	left	left	G	B		30	50	Left	right	W	B
40	70	right	right	G	B		28	50	left	left	G	B		32	50	Right	Right	G	B		36	50	right	right	G	B		32	50	Right	Right	G	B
19	70	left	left	G	A		2	50	left	left	G	A		7	50	Left	Left	G	A		5	50	right	right	G	A		7	50	Left	right	W	A
27	70	right	Left	W	A		9	50	right	right	G	A		12	50	Left	Left	G	A		8	50	left	left	G	A		12	50	Left	Left	G	A
34	70	right	right	G	A		18	50	right	right	G	A		17	50	Left	Left	G	A		23	50	right	right	G	A		17	50	Left	Left	G	A
37	70	left	left	G	A		26	50	left	left	G	A		22	50	Right	Right	G	A		27	50	left	left	G	A		22	50	Right	Right	G	A
14	70	right	right	G	B		31	50	left	left	G	A		26	50	Right	Right	G	A		30	50	left	left	G	A		26	50	Right	Left	W	A
21	70	right	Left	W	B		40	50	right	right	G	A		40	50	Right	Right	G	A		34	50	right	right	G	A		40	50	Right	Right	G	A
24	70	left	left	G	B		25	50	right	right	G	B		12	50	Right	Right	G	B		6	50	left	right	W	B		12	50	Right	Right	G	B
31	70	left	left	G	B		26	50	right	right	G	B		24	50	Left	Left	G	B		9	50	right	right	G	B		24	50	Left	Left	G	B
39	70	left	left	G	B		27	50	left	left	G	B		30	50	Left	Left	G	B		21	50	left	left	G	B		30	50	Left	Left	G	B
40	70	right	right	G	B		28	50	left	left	G	B		32	50	Right	Right	G	B		36	50	right	right	G	B		32	50	Right	Right	G	B
19	70	left	right	W	A		2	50	left	left	G	A		7	50	Left	right	W	A		5	50	right	right	G	A		7	50	Left	Left	G	A
27	70	right	Left	W	A		9	50	right	right	G	A		12	50	Left	Left	G	A		8	50	left	left	G	A		12	50	Left	Left	G	A
34	70	right	right	G	A		18	50	right	right	G	A		17	50	Left	Left	G	A		23	50	right	right	G	A		17	50	Left	Left	G	A
37	70	left	left	G	A		26	50	left	left	G	A		22	50	Right	Right	G	A		27	50	left	left	G	A		22	50	Right	Right	G	A
14	70	right	right	G	B		31	50	left	left	G	A		26	50	Right	Right	G	A		30	50	left	left	G	A		26	50	Right	Right	G	A
21	70	right	right	G	B		40	50	right	right	G	A		40	50	Right	Right	G	A		34	50	right	right	G	A		40	50	Right	Right	G	A
24	70	left	left	G	B		25	50	right	right	G	B		12	50	Right	Right	G	B		6	50	left	left	G	B		12	50	Right	Right	G	B
31	70	left	left	G	B		26	50	right	right	G	B		24	50	Left	Left	G	B		9	50	right	right	G	B		24	50	Left	Left	G	B
39	70	left	left	G	B		27	50	left	left	G	B		30	50	Left	Left	G	B		21	50	left	left	G	B		30	50	Left	Left	G	B
40	70	right	Left	W	B		28	50	left	left	G	B		32	50	Right	Right	G	B		36	50	right	right	G	B		32	50	Right	Right	G	B
19	70	left	left	G	A		2	50	left	left	G	A		7	50	Left	Left	G	A		5	50	right	right	G	A		7	50	Left	Left	G	A
27	70	right	right	G	A		9	50	right	right	G	A		12	50	Left	Left	G	A		8	50	left	left	G	A		12	50	Left	Left	G	A
34	70	right	right	G	A		18	50	right	right	G	A		17	50	Left	Left	G	A		23	50	right	right	G	A		17	50	Left	Left	G	A
37	70	left	left	G	A		26	50	left	left	G	A		22	50	Right	Right	G	A		27	50	left	left	G	A		22	50	Right	Right	G	A
14	70	right	right	G	B		31	50	left	left	G	A		26	50	Right	Right	G	A		30	50	left	left	G	A		26	50	Right	Right	G	A
21	70	right	right	G	B		40	50	right	right	G	A		40	50	Right	Right	G	A		34	50	right	right	G	A		40	50	Right	Right	G	A
24	70	left	left	G	B		25	50	right	right	G	B		12	50	Right	Right	G	B		6	50	left	left	G	B		12	50	Right	Left	W	B
31	70	left	left	G	B		26	50	right	right	G	B		24	50	Left	Left	G	B		9	50	right	right	G	B		24	50	Left	Left	G	B
39	70	left	left	G	B		27	50	left	left	G	B		30	50	Left	Left	G	B		21	50	left	left	G	B		30	50	Left	Left	G	B
40	70	right	right	G	B		28	50	left	left	G	B		32	50	Right	Right	G	B		36	50	right	right	G	B		32	50	Right	Right	G	B
							1	70	right	right	G	A		5	70	Right	Right	G	A		19	70	right	right	G	A		5	70	Right	Left	W	A
							29	70	left	left	G	A		11	70	Right	Right	G	A		24	70	left	left	G	A		11	70	Right	Right	G	A
							36	70	left	left	G	A		15	70	Left	Left	G	A		29	70	left	left	G	A		15	70	Left	right	W	A
							38	70	right	right	G	A		21	70	Left	Left	G	A		31	70	right	right	G	A		21	70	Left	Left	G	A
							2	70	right	right	G	B		2	70	Left	Left	G	B		3	70	right	right	G	B		2	70	Left	right	W	B
							14	70	right	right	G	B		7	70	Right	Right	G	B		20	70	left	left	G	B		7	70	Right	Right	G	B
							22	70	left	left	G	B		13	70	Left	Left	G	B		29	70	right	right	G	B		13	70	Left	Left	G	B
							34	70	right	right	G	B		18	70	Right	Right	G	B		31	70	right	right	G	B		18	70	Right	Right	G	B
							35	70	left	left	G	B		26	70	Right	Right	G	B		35	70	left	left	G	B		26	70	Right	Right	G	B
							37	70	left	left	G	B		31	70	Left	Left	G	B		38	70	left	left	G	B		31	70	Left	Left	G	B
							1	70	right	right	G	A		5	70	Right	Right	G	A		19	70	right	right	G	A		5	70	Right	Right	G	A
							29	70	left	left	G	A		11	70	Right	Right	G	A		24	70	left	left	G	A		11	70	Right	Left	W	A
							36	70	left	left	G	A		15	70	Left	Left	G	A		29	70	left	left	G	A		15	70	Left	Left	G	A
							38	70	right	right	G	A		21	70	Left	Left	G	A		31	70	right	right	G	A		21	70	Left	Left	G	A
							2	70	right	right	G	B		2	70	Left	Left	G	B		3	70	right	right	G	B		2	70	Left	Left	G	B
							14	70	right	right	G	B		7	70	Right	Right	G	B		20	70	left	left	G	B		7	70	Right	Right	G	B
							22	70	left	left	G	B		13	70	Left	Left	G	B		29	70	right	right	G	B		13	70	Left	Left	G	B
							34	70	right	right	G	B		18	70	Right	Right	G	B		31	70	right	right	G	B		18	70	Right	Right	G	B
							35	70	left	left	G	B		26	70	Right	Right	G	B		35	70	left	left	G	B		26	70	Right	Right	G	B
							37	70	left	left	G	B		31	70	Left	Left	G	B		38	70	left	left	G	B		31	70	Left	Left	G	B
							1	70	right	right	G	A		5	70	Right	Right	G	A		19	70	right	right	G	A		5	70	Right	Right	G	A
							29	70	left	left	G	A		11	70	Right	Right	G	A		24	70	left	left	G	A		11	70	Right	Right	G	A
							36	70	left	left	G	A		15	70	Left	Left	G	A		29	70	left	left	G	A		15	70	Left	Left	G	A
							38	70	right	right	G	A		21	70	Left	Left	G	A		31	70	right	right	G	A		21	70	Left	Left	G	A
							2	70	right	right	G	B		2	70	Left	Left	G	B		3	70	right	right	G	B		2	70	Left	Left	G	B
							14	70	right	right	G	B		7	70	Right	Right	G	B		20	70	left	left	G	B		7	70	Right	Right	G	B
							22	70	left	left	G	B		13	70	Left	Left	G	B		29	70	right	right	G	B		13	70	Left	Left	G	B
							34	70	right	right	G	B		18	70	Right	Right	G	B		31	70	right	right	G	B		18	70	Right	Right	G	B
							35	70	left	left	G	B		26	70	Right	Right	G	B		35	70	left	left	G	B		26	70	Right	Right	G	B
							37	70	left	right	W	B		31	70	Left	Left	G	B		38	70	left	left	G	B		31	70	Left	Left	G	B
							1	70	right	right	G	A		5	70	Right	Right	G	A		19	70	right	right	G	A		5	70	Right	Right	G	A
							29	70	left	left	G	A		11	70	Right	Right	G	A		24	70	left	left	G	A		11	70	Right	Right	G	A
							36	70	left	left	G	A		15	70	Left	Left	G	A		29	70	left	left	G	A		15	70	Left	Left	G	A
							38	70	right	right	G	A		21	70	Left	Left	G	A		31	70	right	right	G	A		21	70	Left	Left	G	A
							2	70	right	right	G	B		2	70	Left	Left	G	B		3	70	right	right	G	B		2	70	Left	right	W	B
							14	70	right	right	G	B		7	70	Right	Right	G	B		20	70	left	left	G	B		7	70	Right	Right	G	B
							22	70	left	left	G	B		13	70	Left	Left	G	B		29	70	right	right	G	B		13	70	Left	Left	G	B
							34	70	right	right	G	B		18	70	Right	Right	G	B		31	70	right	right	G	B		18	70	Right	Right	G	B
							35	70	left	left	G	B		26	70	Right	Right	G	B		35	70	left	left	G	B		26	70	Right	Left	W	B
							37	70	left	left	G	B		31	70	Left	Left	G	B		38	70	left	left	G	B		31	70	Left	Left	G	B

## Sheet: Harris's Hawk A Experiment 2
Order	Grating	Side	Choice	Good/wrong
1	80	left	right	W
2	64	right	right	G
3	32	right	right	G
4	240	left	right	W
5	240	right	right	G
6	128	right	right	G
7	64	left	left	G
8	12	right	right	G
9	32	right	right	G
10	80	left	left	G
11	480	left	left	G
12	384	right	right	G
13	80	right	right	G
14	480	left	right	W
15	384	right	right	G
16	384	right	left	W
17	32	right	right	G
18	384	left	left	G
19	64	right	right	G
20	240	left	left	G
21	80	left	left	G
22	384	left	right	W
23	480	right	left	W
24	32	left	left	G
25	12	left	left	G
26	128	left	right	W
27	480	right	right	G
28	12	left	left	G
29	240	left	right	W
30	128	right	left	W
31	480	left	right	W
32	64	left	left	G
33	12	right	left	W
34	12	left	left	G
35	240	right	left	W
36	128	right	left	W
37	80	right	right	G
38	32	left	left	G
39	128	left	left	G
40	64	right	right	G
1	240	Left	Left	G
2	384	Left	right	W
3	480	Right	left	W
4	32	Left	Left	G
5	128	Left	Left	G
6	384	Right	Right	G
7	12	Left	Left	G
8	128	Left	Left	G
9	12	Right	Right	G
10	240	Right	Right	G
11	384	Left	right	W
12	64	Left	Left	G
13	128	Right	Right	G
14	64	Right	Right	G
15	12	Right	Right	G
16	64	Left	Left	G
17	384	Right	left	W
18	32	Left	Left	G
19	32	Right	Right	G
20	480	Right	Right	G
21	32	Left	Left	G
22	480	Left	right	W
23	128	Left	Left	G
24	80	Right	Right	G
25	80	Left	Left	G
26	128	Right	Right	G
27	384	Left	right	W
28	32	Right	Right	G
29	64	Left	Left	G
30	80	Left	Left	G
31	12	Right	Right	G
32	80	Right	Right	G
33	80	Right	Right	G
34	12	Left	Left	G
35	240	Right	Right	G
36	480	Right	Right	G
37	240	Left	Left	G
38	240	Right	Right	G
39	480	Left	Left	G
40	64	Right	Right	G
1	80	left	left	G
2	64	right	left	W
3	32	right	right	G
4	240	left	left	G
5	240	right	right	G
6	128	right	left	W
7	64	left	left	G
8	12	right	right	G
9	32	right	right	G
10	80	left	left	G
11	480	left	right	W
12	384	right	left	W
13	80	right	left	W
14	480	left	left	G
15	384	right	left	W
16	384	right	right	G
17	32	right	left	W
18	384	left	left	G
19	64	right	right	G
20	240	left	left	G
21	80	left	left	G
22	384	left	right	W
23	480	right	left	W
24	32	left	left	G
25	12	left	left	G
26	128	left	left	G
27	480	right	right	G
28	12	left	left	G
29	240	left	right	W
30	128	right	right	G
31	480	left	left	G
32	64	left	left	G
33	12	right	right	G
34	12	left	left	G
35	240	right	left	W
36	128	right	right	G
37	80	right	right	G
38	32	left	left	G
39	128	left	left	G
40	64	right	right	G
1	240	Left	right	W
2	384	Left	Left	G
3	480	Right	Right	G
4	32	Left	Left	G
5	128	Left	Left	G
6	384	Right	Right	G
7	12	Left	Left	G
8	128	Left	Left	G
9	12	Right	Right	G
10	240	Right	left	W
11	384	Left	right	W
12	64	Left	Left	G
13	128	Right	left	W
14	64	Right	Right	G
15	12	Right	Right	G
16	64	Left	Left	G
17	384	Right	Right	G
18	32	Left	Left	G
19	32	Right	Right	G
20	480	Right	Right	G
21	32	Left	Left	G
22	480	Left	right	W
23	128	Left	Left	G
24	80	Right	Right	G
25	80	Left	Left	G
26	128	Right	Right	G
27	384	Left	Left	G
28	32	Right	Right	G
29	64	Left	Left	G
30	80	Left	Left	G
31	12	Right	Right	G
32	80	Right	Right	G
33	80	Right	left	W
34	12	Left	Left	G
35	240	Right	Right	G
36	480	Right	Right	G
37	240	Left	Left	G
38	240	Right	Right	G
39	480	Left	Left	G
40	64	Right	left	W
1	80	left	left	G
2	64	right	right	G
3	32	right	right	G
4	240	left	left	G
5	240	right	right	G
6	128	right	right	G
7	64	left	left	G
8	12	right	left	W
9	32	right	right	G
10	80	left	left	G
11	480	left	left	G
12	384	right	right	G
13	80	right	left	W
14	480	left	left	G
15	384	right	right	G
16	384	right	left	W
17	32	right	right	G
18	384	left	left	G
19	64	right	right	G
20	240	left	left	G
21	80	left	left	G
22	384	left	left	G
23	480	right	left	W
24	32	left	left	G
25	12	left	left	G
26	128	left	left	G
27	480	right	right	G
28	12	left	left	G
29	240	left	left	G
30	128	right	right	G
31	480	left	left	G
32	64	left	left	G
33	12	right	right	G
34	12	left	left	G
35	240	right	right	G
36	128	right	right	G
37	80	right	right	G
38	32	left	left	G
39	128	left	left	G
40	64	right	right	G
1	240	Left	Left	G
2	384	Left	right	W
3	480	Right	left	W
4	32	Left	Left	G
5	128	Left	Left	G
6	384	Right	Right	G
7	12	Left	Left	G
8	128	Left	Left	G
9	12	Right	Right	G
10	240	Right	Right	G
11	384	Left	right	W
12	64	Left	Left	G
13	128	Right	Right	G
14	64	Right	Right	G
15	12	Right	left	W
16	64	Left	Left	G
17	384	Right	Right	G
18	32	Left	Left	G
19	32	Right	Right	G
20	480	Right	left	W
21	32	Left	Left	G
22	480	Left	right	W
23	128	Left	Left	G
24	80	Right	Right	G
25	80	Left	Left	G
26	128	Right	Right	G
27	384	Left	Left	G
28	32	Right	Right	G
29	64	Left	Left	G
30	80	Left	Left	G
31	12	Right	Right	G
32	80	Right	Right	G
33	80	Right	left	W
34	12	Left	Left	G
35	240	Right	Right	G
36	480	Right	left	W
37	240	Left	Left	G
38	240	Right	Right	G
39	480	Left	Left	G
40	64	Right	Right	G
1	80	left	left	G
2	64	right	left	W
3	32	right	right	G
4	240	left	left	G
5	240	right	right	G
6	128	right	left	W
7	64	left	left	G
8	12	right	right	G
9	32	right	right	G
10	80	left	left	G
11	480	left	right	W
12	384	right	left	W
13	80	right	right	G
14	480	left	right	W
15	384	right	left	W
16	384	right	right	G
17	32	right	left	W
18	384	left	left	G
19	64	right	right	G
20	240	left	left	G
21	80	left	left	G
22	384	left	left	G
23	480	right	right	G
24	32	left	left	G
25	12	left	right	W
26	128	left	left	G
27	480	right	right	G
28	12	left	left	G
29	240	left	left	G
30	128	right	right	G
31	480	left	left	G
32	64	left	left	G
33	12	right	right	G
34	12	left	left	G
35	240	right	right	G
36	128	right	left	W
37	80	right	right	G
38	32	left	left	G
39	128	left	left	G
40	64	right	right	G
1	240	Left	Left	G
2	384	Left	right	W
3	480	Right	left	W
4	32	Left	Left	G
5	128	Left	Left	G
6	384	Right	left	W
7	12	Left	Left	G
8	128	Left	Left	G
9	12	Right	Right	G
10	240	Right	Right	G
11	384	Left	Left	G
12	64	Left	Left	G
13	128	Right	Right	G
14	64	Right	left	W
15	12	Right	Right	G
16	64	Left	Left	G
17	384	Right	Right	G
18	32	Left	Left	G
19	32	Right	Right	G
20	480	Right	left	W
21	32	Left	Left	G
22	480	Left	right	W
23	128	Left	Left	G
24	80	Right	Right	G
25	80	Left	Left	G
26	128	Right	left	W
27	384	Left	Left	G
28	32	Right	Right	G
29	64	Left	Left	G
30	80	Left	Left	G
31	12	Right	Right	G
32	80	Right	left	W
33	80	Right	Right	G
34	12	Left	Left	G
35	240	Right	Right	G
36	480	Right	left	W
37	240	Left	right	W
38	240	Right	Right	G
39	480	Left	right	W
40	64	Right	left	W

## Sheet: Harris's Hawk C Experiment 2
Order	Grating	Side	Choice	Good/wrong
1	80	left	left	G
2	64	right	right	G
3	32	right	right	G
4	240	left	left	G
5	240	right	right	G
6	128	right	right	G
7	64	left	left	G
8	12	right	left	W
9	32	right	right	G
10	80	left	left	G
11	480	left	left	G
12	384	right	right	G
13	80	right	left	W
14	480	left	right	W
15	384	right	left	W
16	384	right	left	W
17	32	right	right	G
18	384	left	left	G
19	64	right	right	G
20	240	left	left	G
21	80	left	left	G
22	384	left	left	G
23	480	right	left	W
24	32	left	left	G
25	12	left	right	W
26	128	left	left	G
27	480	right	right	G
28	12	left	left	G
29	240	left	left	G
30	128	right	right	G
31	480	left	left	G
32	64	left	left	G
33	12	right	right	G
34	12	left	left	G
35	240	right	right	G
36	128	right	left	W
37	80	right	right	G
38	32	left	left	G
39	128	left	left	G
40	64	right	right	G
1	240	Left	Left	G
2	384	Left	right	W
3	480	Right	left	W
4	32	Left	Left	G
5	128	Left	Left	G
6	384	Right	Right	G
7	12	Left	Left	G
8	128	Left	Left	G
9	12	Right	left	W
10	240	Right	Right	G
11	384	Left	Left	G
12	64	Left	Left	G
13	128	Right	Right	G
14	64	Right	left	W
15	12	Right	Right	G
16	64	Left	Left	G
17	384	Right	Right	G
18	32	Left	Left	G
19	32	Right	Right	G
20	480	Right	left	W
21	32	Left	Left	G
22	480	Left	Left	G
23	128	Left	Left	G
24	80	Right	Right	G
25	80	Left	Left	G
26	128	Right	Right	G
27	384	Left	Left	G
28	32	Right	Right	G
29	64	Left	Left	G
30	80	Left	Left	G
31	12	Right	Right	G
32	80	Right	left	W
33	80	Right	Right	G
34	12	Left	Left	G
35	240	Right	Right	G
36	480	Right	left	W
37	240	Left	Left	G
38	240	Right	Right	G
39	480	Left	Left	G
40	64	Right	Right	G
1	80	left	left	G
2	64	right	right	G
3	32	right	right	G
4	240	left	left	G
5	240	right	right	G
6	128	right	left	W
7	64	left	left	G
8	12	right	right	G
9	32	right	left	W
10	80	left	left	G
11	480	left	right	W
12	384	right	left	W
13	80	right	right	G
14	480	left	left	G
15	384	right	right	G
16	384	right	left	W
17	32	right	right	G
18	384	left	left	G
19	64	right	left	W
20	240	left	right	W
21	80	left	left	G
22	384	left	left	G
23	480	right	right	G
24	32	left	left	G
25	12	left	left	G
26	128	left	left	G
27	480	right	right	G
28	12	left	left	G
29	240	left	left	G
30	128	right	right	G
31	480	left	left	G
32	64	left	left	G
33	12	right	right	G
34	12	left	left	G
35	240	right	right	G
36	128	right	left	W
37	80	right	right	G
38	32	left	left	G
39	128	left	right	W
40	64	right	right	G
1	240	Left	Left	G
2	384	Left	right	W
3	480	Right	left	W
4	32	Left	Left	G
5	128	Left	Left	G
6	384	Right	Right	G
7	12	Left	Left	G
8	128	Left	right	W
9	12	Right	left	W
10	240	Right	Right	G
11	384	Left	Left	G
12	64	Left	Left	G
13	128	Right	Right	G
14	64	Right	left	W
15	12	Right	Right	G
16	64	Left	Left	G
17	384	Right	left	W
18	32	Left	Left	G
19	32	Right	Right	G
20	480	Right	left	W
21	32	Left	Left	G
22	480	Left	Left	G
23	128	Left	Left	G
24	80	Right	Right	G
25	80	Left	Left	G
26	128	Right	Right	G
27	384	Left	Left	G
28	32	Right	Right	G
29	64	Left	Left	G
30	80	Left	Left	G
31	12	Right	Right	G
32	80	Right	left	W
33	80	Right	Right	G
34	12	Left	Left	G
35	240	Right	Right	G
36	480	Right	left	W
37	240	Left	right	W
38	240	Right	Right	G
39	480	Left	right	W
40	64	Right	left	W
1	80	left	left	G
2	64	right	right	G
3	32	right	right	G
4	240	left	left	G
5	240	right	right	G
6	128	right	left	W
7	64	left	left	G
8	12	right	right	G
9	32	right	right	G
10	80	left	left	G
11	480	left	right	W
12	384	right	left	W
13	80	right	left	W
14	480	left	right	W
15	384	right	right	G
16	384	right	right	G
17	32	right	right	G
18	384	left	left	G
19	64	right	right	G
20	240	left	left	G
21	80	left	left	G
22	384	left	right	W
23	480	right	right	G
24	32	left	left	G
25	12	left	left	G
26	128	left	left	G
27	480	right	right	G
28	12	left	left	G
29	240	left	right	W
30	128	right	left	W
31	480	left	right	W
32	64	left	left	G
33	12	right	left	W
34	12	left	left	G
35	240	right	right	G
36	128	right	right	G
37	80	right	right	G
38	32	left	left	G
39	128	left	right	W
40	64	right	right	G
1	240	Left	Left	G
2	384	Left	right	W
3	480	Right	left	W
4	32	Left	Left	G
5	128	Left	Left	G
6	384	Right	Right	G
7	12	Left	Left	G
8	128	Left	right	W
9	12	Right	Right	G
10	240	Right	Right	G
11	384	Left	Left	G
12	64	Left	Left	G
13	128	Right	Right	G
14	64	Right	left	W
15	12	Right	Right	G
16	64	Left	Left	G
17	384	Right	Right	G
18	32	Left	Left	G
19	32	Right	Right	G
20	480	Right	left	W
21	32	Left	Left	G
22	480	Left	right	W
23	128	Left	Left	G
24	80	Right	Right	G
25	80	Left	Left	G
26	128	Right	left	W
27	384	Left	right	W
28	32	Right	Right	G
29	64	Left	Left	G
30	80	Left	Left	G
31	12	Right	Right	G
32	80	Right	left	W
33	80	Right	Right	G
34	12	Left	Left	G
35	240	Right	Right	G
36	480	Right	Right	G
37	240	Left	Left	G
38	240	Right	Right	G
39	480	Left	right	W
40	64	Right	left	W
1	80	left	left	G
2	64	right	right	G
3	32	right	left	W
4	240	left	right	W
5	240	right	left	W
6	128	right	right	G
7	64	left	left	G
8	12	right	right	G
9	32	right	left	W
10	80	left	left	G
11	480	left	right	W
12	384	right	left	W
13	80	right	right	G
14	480	left	left	G
15	384	right	right	G
16	384	right	left	W
17	32	right	right	G
18	384	left	left	G
19	64	right	right	G
20	240	left	left	G
21	80	left	left	G
22	384	left	right	W
23	480	right	right	G
24	32	left	left	G
25	12	left	left	G
26	128	left	left	G
27	480	right	right	G
28	12	left	left	G
29	240	left	right	W
30	128	right	right	G
31	480	left	left	G
32	64	left	right	W
33	12	right	left	W
34	12	left	left	G
35	240	right	right	G
36	128	right	left	W
37	80	right	right	G
38	32	left	left	G
39	128	left	right	W
40	64	right	right	G
1	240	Left	Left	G
2	384	Left	right	W
3	480	Right	left	W
4	32	Left	Left	G
5	128	Left	right	W
6	384	Right	Right	G
7	12	Left	Left	G
8	128	Left	Left	G
9	12	Right	Right	G
10	240	Right	left	W
11	384	Left	right	W
12	64	Left	Left	G
13	128	Right	Right	G
14	64	Right	Right	G
15	12	Right	left	W
16	64	Left	Left	G
17	384	Right	Right	G
18	32	Left	Left	G
19	32	Right	Right	G
20	480	Right	left	W
21	32	Left	right	W
22	480	Left	Left	G
23	128	Left	Left	G
24	80	Right	Right	G
25	80	Left	Left	G
26	128	Right	left	W
27	384	Left	right	W
28	32	Right	Right	G
29	64	Left	Left	G
30	80	Left	Left	G
31	12	Right	Right	G
32	80	Right	left	W
33	80	Right	Right	G
34	12	Left	Left	G
35	240	Right	Right	G
36	480	Right	left	W
37	240	Left	right	W
38	240	Right	left	W
39	480	Left	Left	G
40	64	Right	Right	G
